# Supplementary material for: An indole-linked C8-deoxyguanosine nucleoside acts as a fluorescent reporter of Watson–Crick versus Hoogsteen base pairing
Source: Royal Society of Chemistry journal article supplement (doi:10.1039/c0ob00883d), 2010-11-23
Supplement: c0ob00883d.pdf [file c0ob00883d.pdf]

## Supplementary Information to:

### An Indole-Linked C<sup>8</sup>-Deoxyguanosine Nucleoside is a Fluorescent Probe for Sensing Watson-Crick Versus Hoogsteen Base Pairing

*Katherine M. Schlitt, Andrea L. Millen, Stacey D. Wetmore and Richard A. Manderville*

#### Table of Contents

1. Figure S1. Fluorescence emission titration of bissilyl**1** in CHCl<sub>3</sub> with (a) bissilyl dC and (b) G(TBDMS)<sub>3</sub>.
2. NMR Spectra of **1** and **2**
3. Cartesian Coordinates and absolute energies of structures.

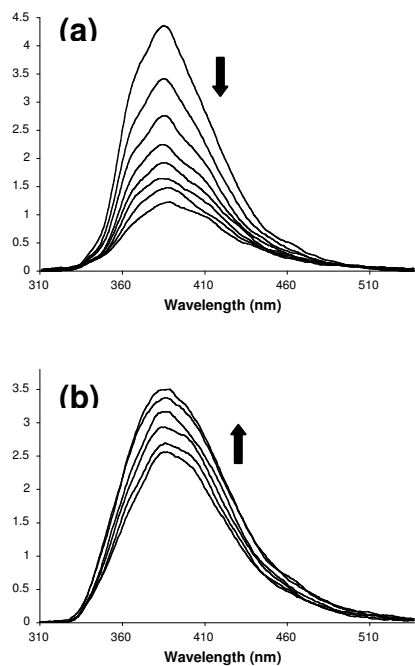

Figure S1. Fluorescence emission titration of bissilyl**1** in CHCl<sub>3</sub> with (a) bissilyl dC and (b) G(TBDMS)<sub>3</sub>.

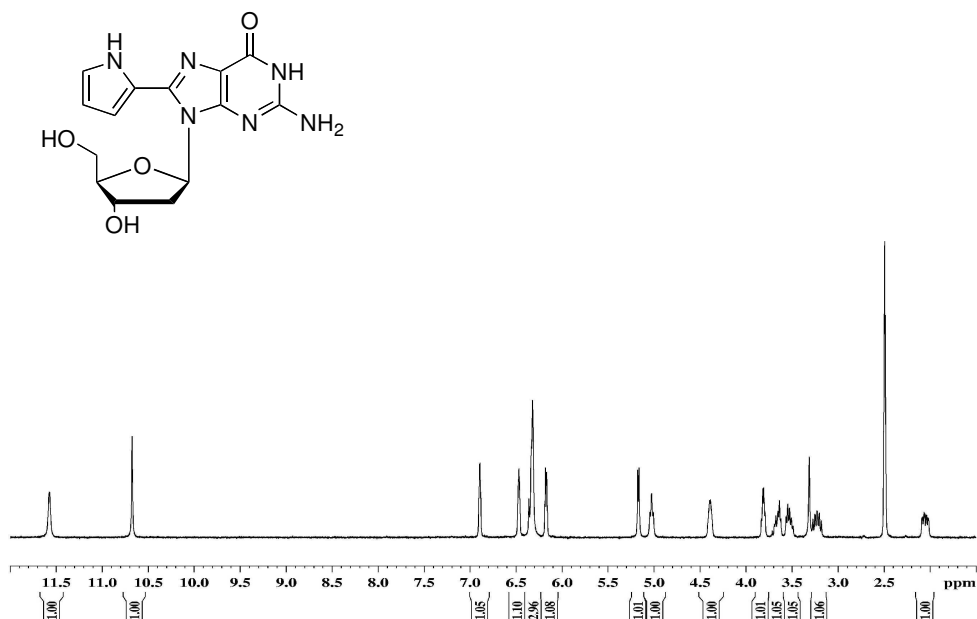

Figure S2. <sup>1</sup>H NMR spectrum of 8-(2''-pyrrolyl)-2'-deoxyguanosine (**1**) in DMSO-*d*<sub>6</sub>.

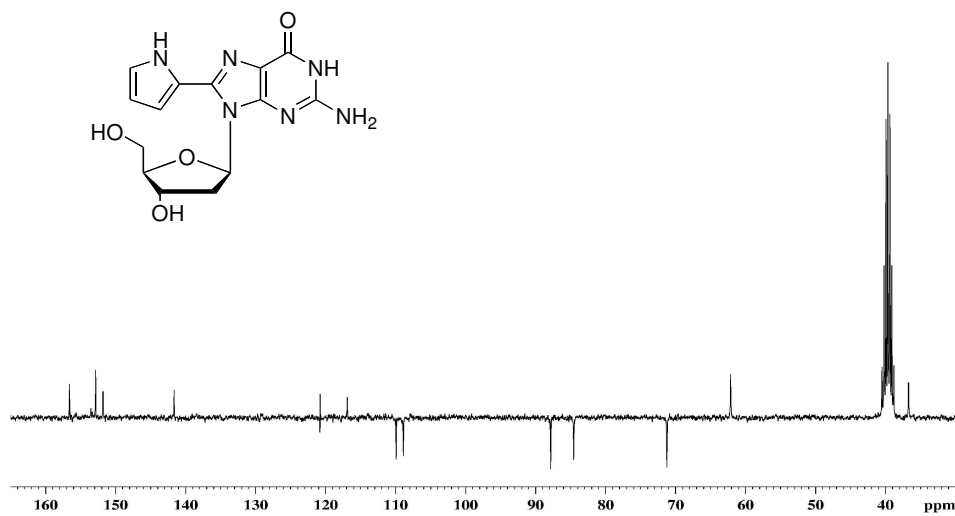

Figure S3. <sup>13</sup>C NMR spectrum of 8-(2''-pyrrolyl)-2'-deoxyguanosine (**1**) in DMSO-*d*<sub>6</sub>.

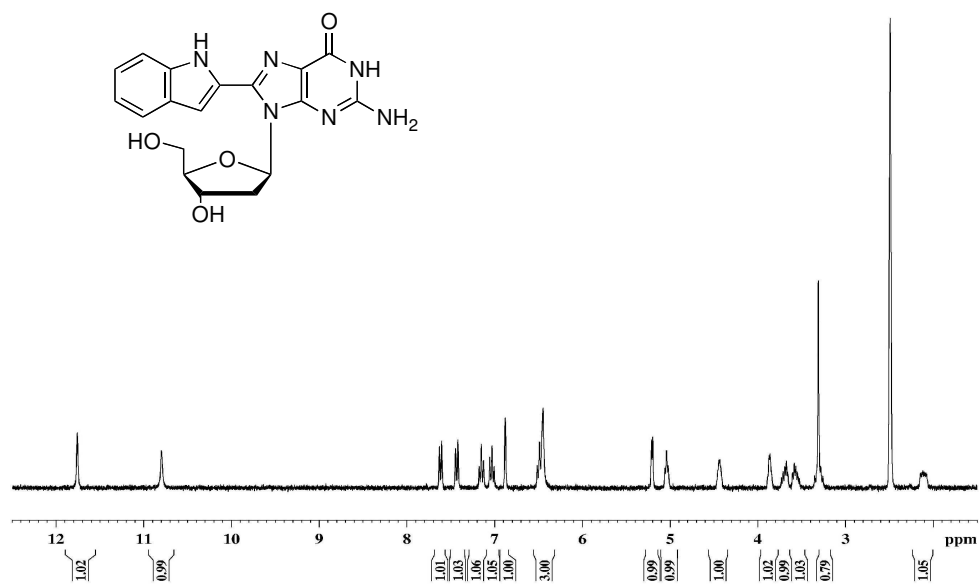

Figure S4. <sup>1</sup>H NMR spectrum of 8-(2''-benzopyrrolyl)-2'-deoxyguanosine (**2**) in DMSO-*d*<sub>6</sub>.

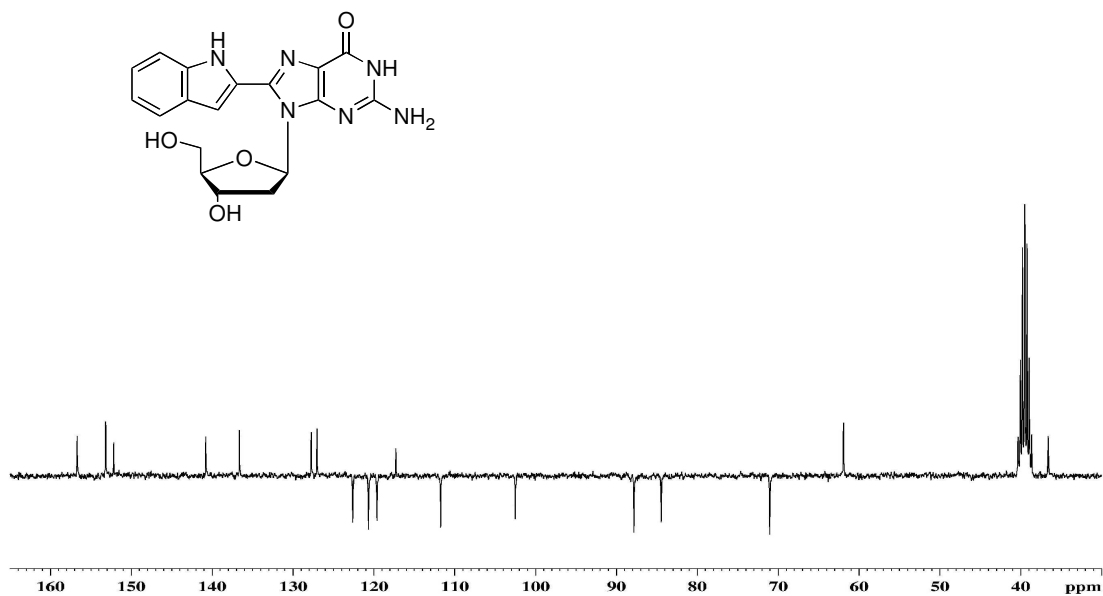

Figure S5. <sup>13</sup>C NMR spectrum of 8-(2''-benzopyrrolyl)-2'-deoxyguanosine (**2**) in DMSO-*d*<sub>6</sub>.

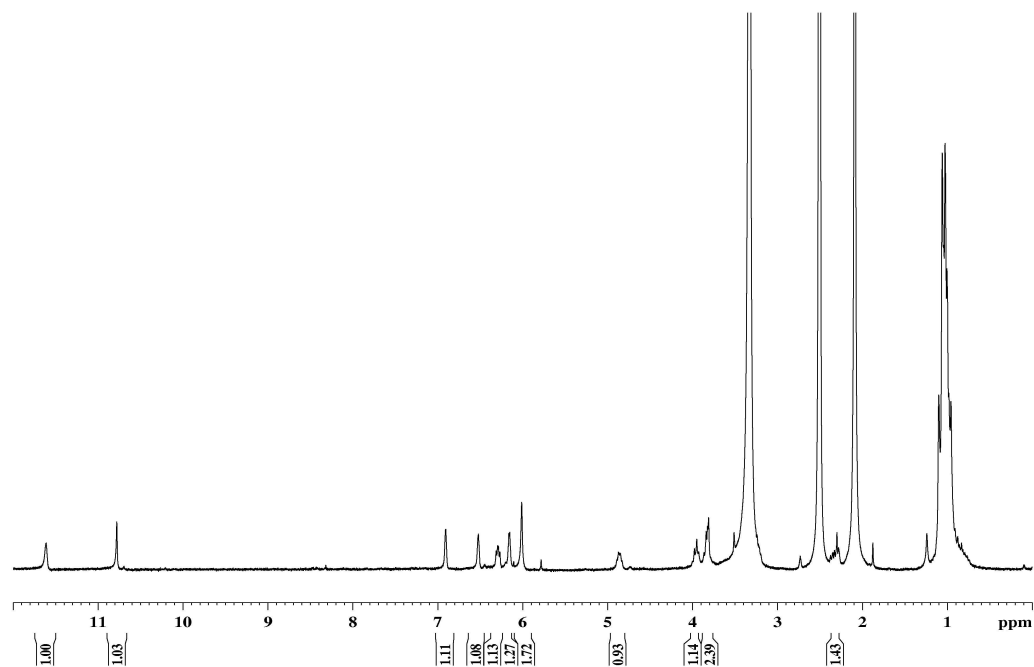

Figure S6. <sup>1</sup>H NMR spectrum of 8-(2''-pyrrolyl)-3', 5'-*O*-(1,1,3,3-tetraisopropylidisiloxane-1,3-diyl)-2'-deoxyguanosine (**bissilyl1**) in DMSO-*d*<sub>6</sub>.

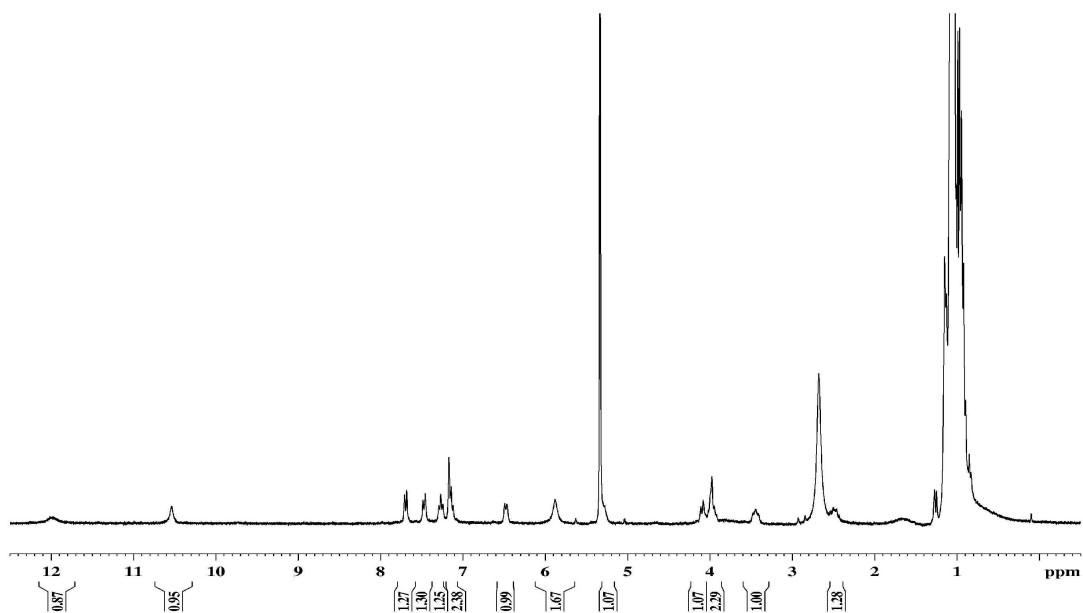

Figure S7. <sup>1</sup>H NMR spectrum of 8-(2''-benzopyrrolyl)-3', 5'-*O*-(1,1,3,3-tetraisopropylidisiloxane-1,3-diyl)-2'-deoxyguanosine (**bissilyl2**) in CD<sub>2</sub>Cl<sub>2</sub>.

### Cartesian Coordinates and Absolute Energies (Hartrees) for Monomers when dR=H

G Monomer Energy: -542.7434272

---

| Center Number | Atomic Number | Atomic Type | Coordinates (Angstroms) |           |           |
|---------------|---------------|-------------|-------------------------|-----------|-----------|
|               |               |             | X                       | Y         | Z         |
| 1             | 7             | 0           | -1.730140               | -1.508015 | -0.004434 |
| 2             | 6             | 0           | -2.713642               | -0.533509 | 0.001344  |
| 3             | 1             | 0           | -3.764006               | -0.790397 | -0.000293 |
| 4             | 7             | 0           | -2.226269               | 0.679981  | 0.009078  |
| 5             | 6             | 0           | -0.855890               | 0.502709  | 0.008377  |
| 6             | 6             | 0           | 0.208422                | 1.473579  | 0.003091  |
| 7             | 8             | 0           | 0.188118                | 2.691466  | -0.004449 |
| 8             | 7             | 0           | 1.476486                | 0.792250  | -0.003278 |
| 9             | 1             | 0           | 2.267171                | 1.420794  | -0.077048 |
| 10            | 6             | 0           | 1.674921                | -0.564425 | -0.003357 |
| 11            | 7             | 0           | 2.978340                | -1.003662 | -0.068261 |
| 12            | 1             | 0           | 3.680994                | -0.445022 | 0.395587  |
| 13            | 1             | 0           | 3.064262                | -1.996728 | 0.098969  |
| 14            | 7             | 0           | 0.698125                | -1.440749 | 0.006881  |
| 15            | 6             | 0           | -0.526567               | -0.853292 | -0.000886 |
| 16            | 1             | 0           | -1.852626               | -2.509390 | -0.012939 |

---

Cytosine Monomer Energy: -395.0752911

---

| Center Number | Atomic Number | Atomic Type | Coordinates (Angstroms) |           |           |
|---------------|---------------|-------------|-------------------------|-----------|-----------|
|               |               |             | X                       | Y         | Z         |
| 1             | 7             | 0           | 1.279459                | 0.896626  | 0.002873  |
| 2             | 6             | 0           | 0.199622                | 1.715216  | 0.001612  |
| 3             | 1             | 0           | 0.391798                | 2.783166  | 0.002686  |
| 4             | 6             | 0           | -1.052113               | 1.186106  | -0.002286 |
| 5             | 1             | 0           | -1.933213               | 1.814295  | -0.014047 |
| 6             | 6             | 0           | -1.131140               | -0.253094 | -0.003432 |
| 7             | 7             | 0           | -2.358281               | -0.845069 | -0.041527 |
| 8             | 1             | 0           | -2.378242               | -1.844979 | 0.092567  |
| 9             | 1             | 0           | -3.186583               | -0.319159 | 0.182644  |
| 10            | 7             | 0           | -0.081940               | -1.053133 | 0.002923  |
| 11            | 6             | 0           | 1.187476                | -0.530054 | -0.000074 |
| 12            | 8             | 0           | 2.223338                | -1.174116 | 0.000777  |
| 13            | 1             | 0           | 2.221799                | 1.261583  | 0.005140  |

---

1 Monomer Energy: -751.8014893

---

| Center Number | Atomic Number | Atomic Type | Coordinates (Angstroms) |           |           |
|---------------|---------------|-------------|-------------------------|-----------|-----------|
|               |               |             | X                       | Y         | Z         |
| 1             | 7             | 0           | 0.259520                | -1.215105 | -0.002981 |
| 2             | 6             | 0           | 1.105109                | -0.114815 | 0.002266  |
| 3             | 6             | 0           | -1.024838               | -0.734959 | -0.000484 |
| 4             | 7             | 0           | 0.435498                | 1.022833  | 0.008937  |
| 5             | 6             | 0           | -0.892206               | 0.654379  | 0.008020  |
| 6             | 7             | 0           | -2.153050               | -1.488307 | 0.007955  |
| 7             | 6             | 0           | -2.082771               | 1.463022  | 0.001706  |

---

|    |   |   |           |           |           |
|----|---|---|-----------|-----------|-----------|
| 8  | 6 | 0 | -3.245708 | -0.760632 | -0.002898 |
| 9  | 8 | 0 | -2.232634 | 2.673212  | -0.006075 |
| 10 | 7 | 0 | -3.241663 | 0.610091  | -0.004392 |
| 11 | 7 | 0 | -4.473836 | -1.381789 | -0.068516 |
| 12 | 1 | 0 | -4.113261 | 1.120253  | -0.080195 |
| 13 | 1 | 0 | -5.245242 | -0.932817 | 0.405532  |
| 14 | 1 | 0 | -4.414120 | -2.377176 | 0.097071  |
| 15 | 6 | 0 | 2.544935  | -0.206770 | 0.000752  |
| 16 | 6 | 0 | 3.439101  | -1.270235 | -0.002974 |
| 17 | 6 | 0 | 4.747337  | -0.721633 | -0.002671 |
| 18 | 1 | 0 | 3.182903  | -2.320944 | -0.005559 |
| 19 | 6 | 0 | 4.618500  | 0.655299  | 0.001161  |
| 20 | 7 | 0 | 3.284416  | 0.952760  | 0.003318  |
| 21 | 1 | 0 | 2.852121  | 1.865238  | 0.006033  |
| 22 | 1 | 0 | 5.366341  | 1.433834  | 0.002343  |
| 23 | 1 | 0 | 5.678030  | -1.270474 | -0.005125 |
| 24 | 1 | 0 | 0.521352  | -2.188937 | -0.011009 |

2 Monomer Energy: -905.4939919

| Center Number | Atomic Number | Atomic Type | Coordinates (Angstroms) |           |           |
|---------------|---------------|-------------|-------------------------|-----------|-----------|
|               |               |             | X                       | Y         | Z         |
| 1             | 7             | 0           | 1.001302                | -1.237186 | -0.001541 |
| 2             | 6             | 0           | 0.142293                | -0.147412 | 0.002626  |
| 3             | 6             | 0           | 2.278130                | -0.741167 | 0.000124  |
| 4             | 7             | 0           | 0.797416                | 0.998577  | 0.007996  |
| 5             | 6             | 0           | 2.127803                | 0.647717  | 0.007350  |
| 6             | 7             | 0           | 3.415612                | -1.478864 | 0.008564  |
| 7             | 6             | 0           | 3.308482                | 1.472437  | 0.000756  |
| 8             | 6             | 0           | 4.499177                | -0.736442 | -0.002517 |
| 9             | 8             | 0           | 3.441322                | 2.683775  | -0.007866 |
| 10            | 7             | 0           | 4.477883                | 0.634412  | -0.004651 |
| 11            | 7             | 0           | 5.732531                | -1.342083 | -0.066525 |
| 12            | 1             | 0           | 5.343071                | 1.155904  | -0.078053 |
| 13            | 1             | 0           | 6.506771                | -0.877497 | 0.386586  |
| 14            | 1             | 0           | 5.690403                | -2.338036 | 0.099510  |
| 15            | 6             | 0           | -1.297289               | -0.254474 | 0.001546  |
| 16            | 6             | 0           | -2.151547               | -1.340005 | -0.001786 |
| 17            | 6             | 0           | -3.486400               | -0.823864 | -0.001517 |
| 18            | 1             | 0           | -1.865019               | -2.382673 | -0.004119 |
| 19            | 6             | 0           | -3.380715               | 0.598909  | 0.002044  |
| 20            | 7             | 0           | -2.041809               | 0.910030  | 0.003920  |
| 21            | 1             | 0           | -1.613997               | 1.823998  | 0.005705  |
| 22            | 6             | 0           | -4.506996               | 1.429385  | 0.003099  |
| 23            | 6             | 0           | -5.754195               | 0.817521  | 0.000572  |
| 24            | 6             | 0           | -5.882721               | -0.588007 | -0.002925 |
| 25            | 6             | 0           | -4.765564               | -1.410528 | -0.003974 |
| 26            | 1             | 0           | -4.409497               | 2.510878  | 0.005695  |
| 27            | 1             | 0           | -6.648496               | 1.433455  | 0.001231  |
| 28            | 1             | 0           | -6.875055               | -1.028939 | -0.004889 |
| 29            | 1             | 0           | -4.873903               | -2.491470 | -0.006766 |
| 30            | 1             | 0           | 0.751874                | -2.214436 | -0.008710 |

**Cartesian Coordinates and Absolute Energies (Hartrees) for H-bonded Complexes when dR=H**

G:C Counterpoise Corrected Energy: -937.857673695388

BSSE energy: 0.001064926403

---

| Center<br>Number | Atomic<br>Number | Atomic<br>Type | Coordinates (Angstroms) |           |           |
|------------------|------------------|----------------|-------------------------|-----------|-----------|
|                  |                  |                | X                       | Y         | Z         |
| 1                | 7                | 0              | -4.667621               | 0.494244  | -0.003690 |
| 2                | 6                | 0              | -4.972871               | -0.859244 | -0.004977 |
| 3                | 6                | 0              | -3.299205               | 0.592673  | -0.000543 |
| 4                | 7                | 0              | -3.912140               | -1.621176 | -0.004206 |
| 5                | 6                | 0              | -2.849037               | -0.732538 | -0.000866 |
| 6                | 7                | 0              | -2.585857               | 1.737216  | 0.002044  |
| 7                | 6                | 0              | -1.436470               | -0.959032 | 0.001475  |
| 8                | 6                | 0              | -1.278168               | 1.514695  | 0.004782  |
| 9                | 8                | 0              | -0.824455               | -2.038309 | 0.001170  |
| 10               | 7                | 0              | -0.724026               | 0.255809  | 0.004201  |
| 11               | 7                | 0              | -0.417929               | 2.554488  | 0.010255  |
| 12               | 1                | 0              | 0.305995                | 0.166204  | 0.004473  |
| 13               | 1                | 0              | 0.597657                | 2.439117  | 0.002126  |
| 14               | 1                | 0              | -0.824271               | 3.474740  | 0.002442  |
| 15               | 1                | 0              | -5.308791               | 1.272715  | -0.004336 |
| 16               | 7                | 0              | 4.343221                | 0.904849  | -0.005088 |
| 17               | 6                | 0              | 4.941097                | -0.317787 | -0.002942 |
| 18               | 1                | 0              | 6.025459                | -0.328628 | -0.004370 |
| 19               | 6                | 0              | 4.188709                | -1.445728 | 0.000717  |
| 20               | 1                | 0              | 4.644641                | -2.427177 | 0.002359  |
| 21               | 6                | 0              | 2.753998                | -1.277510 | 0.002094  |
| 22               | 7                | 0              | 1.945867                | -2.341186 | 0.005281  |
| 23               | 1                | 0              | 0.914006                | -2.223457 | 0.004088  |
| 24               | 1                | 0              | 2.336285                | -3.269342 | 0.005882  |
| 25               | 7                | 0              | 2.187361                | -0.063869 | 0.000388  |
| 26               | 6                | 0              | 2.941940                | 1.066187  | -0.003575 |
| 27               | 8                | 0              | 2.487344                | 2.214372  | -0.006014 |
| 28               | 1                | 0              | 4.881026                | 1.760151  | -0.008004 |
| 29               | 1                | 0              | -5.997200               | -1.205746 | -0.007191 |

---

G:G Counterpoise Corrected Energy: -1085.512409624652

BSSE energy: 0.000750990118

---

| Center<br>Number | Atomic<br>Number | Atomic<br>Type | Coordinates (Angstroms) |           |           |
|------------------|------------------|----------------|-------------------------|-----------|-----------|
|                  |                  |                | X                       | Y         | Z         |
| 1                | 7                | 0              | -2.593890               | -2.363465 | -0.053756 |
| 2                | 6                | 0              | -1.255935               | -2.028720 | -0.131449 |
| 3                | 6                | 0              | -3.306583               | -1.190763 | -0.007923 |
| 4                | 7                | 0              | -1.081970               | -0.730598 | -0.141860 |
| 5                | 6                | 0              | -2.343262               | -0.188094 | -0.064897 |
| 6                | 7                | 0              | -4.653579               | -1.054485 | 0.065092  |
| 7                | 6                | 0              | -2.744195               | 1.183426  | -0.006383 |
| 8                | 6                | 0              | -5.034628               | 0.201529  | 0.114447  |
| 9                | 8                | 0              | -2.065051               | 2.206111  | -0.010625 |
| 10               | 7                | 0              | -4.163841               | 1.268285  | 0.082705  |
| 11               | 7                | 0              | -6.366749               | 0.499218  | 0.258201  |

---

|    |   |   |           |           |           |
|----|---|---|-----------|-----------|-----------|
| 12 | 1 | 0 | -4.515133 | 2.211715  | 0.195666  |
| 13 | 1 | 0 | -6.710776 | 1.355450  | -0.152255 |
| 14 | 1 | 0 | -6.970165 | -0.301092 | 0.130349  |
| 15 | 7 | 0 | 5.523099  | 0.775904  | 0.161713  |
| 16 | 6 | 0 | 5.976158  | -0.532921 | 0.207970  |
| 17 | 1 | 0 | 7.029482  | -0.762894 | 0.294445  |
| 18 | 7 | 0 | 5.008445  | -1.408512 | 0.136562  |
| 19 | 6 | 0 | 3.856746  | -0.646268 | 0.037203  |
| 20 | 6 | 0 | 2.475945  | -1.037184 | -0.064865 |
| 21 | 8 | 0 | 1.968345  | -2.157826 | -0.087544 |
| 22 | 7 | 0 | 1.645880  | 0.112120  | -0.145085 |
| 23 | 1 | 0 | 0.638257  | -0.100729 | -0.195908 |
| 24 | 6 | 0 | 2.056791  | 1.416616  | -0.123147 |
| 25 | 7 | 0 | 1.092497  | 2.369257  | -0.248566 |
| 26 | 1 | 0 | 0.105455  | 2.163559  | -0.131475 |
| 27 | 1 | 0 | 1.395990  | 3.315908  | -0.088105 |
| 28 | 7 | 0 | 3.324371  | 1.784417  | -0.020878 |
| 29 | 6 | 0 | 4.155944  | 0.719749  | 0.051047  |
| 30 | 1 | 0 | 6.071008  | 1.621688  | 0.197815  |
| 31 | 1 | 0 | -0.446077 | -2.745996 | -0.169509 |
| 32 | 1 | 0 | -2.986123 | -3.293101 | -0.026583 |

-----  
**1**:C Counterpoise Corrected Energy: -1146.915466179709  
BSSE Energy: 0.001058781690

| Center<br>Number | Atomic<br>Number | Atomic<br>Type | Coordinates (Angstroms) |           |           |
|------------------|------------------|----------------|-------------------------|-----------|-----------|
|                  |                  |                | X                       | Y         | Z         |
| 1                | 7                | 0              | -2.994385               | 1.392438  | -0.001279 |
| 2                | 6                | 0              | -3.522196               | 0.106762  | 0.000365  |
| 3                | 6                | 0              | -1.627535               | 1.269004  | -0.003704 |
| 4                | 7                | 0              | -2.581419               | -0.816225 | -0.000924 |
| 5                | 6                | 0              | -1.393161               | -0.111691 | -0.003493 |
| 6                | 7                | 0              | -0.741533               | 2.283251  | -0.005869 |
| 7                | 6                | 0              | -0.035518               | -0.558650 | -0.005077 |
| 8                | 6                | 0              | 0.515342                | 1.856718  | -0.008219 |
| 9                | 8                | 0              | 0.395112                | -1.723817 | -0.004561 |
| 10               | 7                | 0              | 0.861934                | 0.526449  | -0.007293 |
| 11               | 7                | 0              | 1.528549                | 2.748158  | -0.015241 |
| 12               | 1                | 0              | 1.864595                | 0.274114  | -0.005759 |
| 13               | 1                | 0              | 2.513138                | 2.474380  | 0.000621  |
| 14               | 1                | 0              | 1.272040                | 3.720799  | -0.001554 |
| 15               | 6                | 0              | -4.937185               | -0.179029 | 0.002885  |
| 16               | 6                | 0              | -6.077515               | 0.614404  | 0.005219  |
| 17               | 6                | 0              | -7.198503               | -0.256303 | 0.007081  |
| 18               | 1                | 0              | -6.103360               | 1.695517  | 0.005698  |
| 19               | 6                | 0              | -6.716170               | -1.551845 | 0.005819  |
| 20               | 7                | 0              | -5.349645               | -1.490761 | 0.003405  |
| 21               | 1                | 0              | -4.692788               | -2.257368 | 0.001580  |
| 22               | 7                | 0              | 5.966775                | 0.360549  | 0.010682  |
| 23               | 6                | 0              | 6.362316                | -0.941590 | 0.005117  |
| 24               | 1                | 0              | 7.431112                | -1.124900 | 0.006593  |
| 25               | 6                | 0              | 5.440023                | -1.935466 | -0.001748 |
| 26               | 1                | 0              | 5.734269                | -2.976877 | -0.006095 |
| 27               | 6                | 0              | 4.050407                | -1.541173 | -0.002822 |
| 28               | 7                | 0              | 3.082964                | -2.462401 | -0.009005 |



|    |   |   |           |           |           |
|----|---|---|-----------|-----------|-----------|
| 29 | 1 | 0 | 2.083061  | -2.181420 | -0.007211 |
| 30 | 1 | 0 | 3.320549  | -3.440835 | -0.011855 |
| 31 | 7 | 0 | 3.684238  | -0.252920 | 0.002147  |
| 32 | 6 | 0 | 4.608969  | 0.742775  | 0.009494  |
| 33 | 8 | 0 | 4.342692  | 1.948482  | 0.015183  |
| 34 | 1 | 0 | 6.633827  | 1.119345  | 0.015948  |
| 35 | 1 | 0 | -7.235065 | -2.498541 | 0.006595  |
| 36 | 1 | 0 | -8.240071 | 0.031540  | 0.009151  |
| 37 | 1 | 0 | -3.501723 | 2.263669  | -0.000544 |

-----  
**1:G Counterpoise Corrected Energy:** -1294.578037604043  
**BSSE Energy:** 0.001152859721  
-----

| Center<br>Number | Atomic<br>Number | Atomic<br>Type | Coordinates (Angstroms) |           |           |
|------------------|------------------|----------------|-------------------------|-----------|-----------|
|                  |                  |                | X                       | Y         | Z         |
| 1                | 7                | 0              | -3.152093               | 1.471542  | 0.051507  |
| 2                | 6                | 0              | -1.762569               | 1.524345  | 0.096899  |
| 3                | 6                | 0              | -3.517874               | 0.160542  | -0.053574 |
| 4                | 7                | 0              | -1.233245               | 0.309173  | 0.037873  |
| 5                | 6                | 0              | -2.315460               | -0.548649 | -0.057749 |
| 6                | 7                | 0              | -4.785032               | -0.310617 | -0.127646 |
| 7                | 6                | 0              | -2.374226               | -1.972224 | -0.149433 |
| 8                | 6                | 0              | -4.838663               | -1.617258 | -0.239736 |
| 9                | 8                | 0              | -1.475603               | -2.817495 | -0.155829 |
| 10               | 7                | 0              | -3.722168               | -2.415886 | -0.252858 |
| 11               | 7                | 0              | -6.053075               | -2.238851 | -0.404627 |
| 12               | 1                | 0              | -3.810354               | -3.415487 | -0.390459 |
| 13               | 1                | 0              | -6.163975               | -3.167978 | -0.023940 |
| 14               | 1                | 0              | -6.836845               | -1.623503 | -0.236210 |
| 15               | 6                | 0              | -1.088150               | 2.792275  | 0.199507  |
| 16               | 6                | 0              | -1.595396               | 4.038325  | 0.575689  |
| 17               | 6                | 0              | -0.529624               | 4.961311  | 0.510140  |
| 18               | 1                | 0              | -2.607361               | 4.245627  | 0.898249  |
| 19               | 6                | 0              | 0.590400                | 4.255248  | 0.094120  |
| 20               | 7                | 0              | 0.245891                | 2.952841  | -0.086152 |
| 21               | 1                | 0              | 0.892334                | 2.228387  | -0.439092 |
| 22               | 7                | 0              | 5.618490                | -1.587356 | 0.196993  |
| 23               | 6                | 0              | 6.139728                | -0.453389 | -0.407702 |
| 24               | 1                | 0              | 7.204805                | -0.328289 | -0.547867 |
| 25               | 7                | 0              | 5.219786                | 0.401378  | -0.768002 |
| 26               | 6                | 0              | 4.029074                | -0.194258 | -0.386887 |
| 27               | 6                | 0              | 2.678452                | 0.265993  | -0.492935 |
| 28               | 8                | 0              | 2.267473                | 1.331840  | -0.967316 |
| 29               | 7                | 0              | 1.768488                | -0.673075 | 0.043125  |
| 30               | 1                | 0              | 0.780814                | -0.387056 | 0.030363  |
| 31               | 6                | 0              | 2.111897                | -1.885531 | 0.599803  |
| 32               | 7                | 0              | 1.098179                | -2.647566 | 1.086563  |
| 33               | 1                | 0              | 0.173282                | -2.587210 | 0.654728  |
| 34               | 1                | 0              | 1.394584                | -3.575700 | 1.350625  |
| 35               | 7                | 0              | 3.359922                | -2.311186 | 0.712487  |
| 36               | 6                | 0              | 4.255893                | -1.432837 | 0.217556  |
| 37               | 1                | 0              | 6.122849                | -2.382367 | 0.558726  |
| 38               | 1                | 0              | 1.602156                | 4.584102  | -0.091053 |
| 39               | 1                | 0              | -0.568142               | 6.015264  | 0.745066  |
| 40               | 1                | 0              | -3.776008               | 2.263296  | 0.016999  |

2:C Counterpoise Corrected Energy: -1300.608510612905  
BSSE Energy: 0.001053047568

| Center<br>Number | Atomic<br>Number | Atomic<br>Type | Coordinates (Angstroms) |           |           |
|------------------|------------------|----------------|-------------------------|-----------|-----------|
|                  |                  |                | X                       | Y         | Z         |
| 1                | 7                | 0              | 1.709164                | 1.740998  | -0.007471 |
| 2                | 6                | 0              | 2.329199                | 0.497343  | -0.013959 |
| 3                | 6                | 0              | 0.356318                | 1.517805  | -0.027076 |
| 4                | 7                | 0              | 1.457800                | -0.491913 | -0.035482 |
| 5                | 6                | 0              | 0.223818                | 0.122765  | -0.044106 |
| 6                | 7                | 0              | -0.602416               | 2.462437  | -0.027795 |
| 7                | 6                | 0              | -1.098542               | -0.424598 | -0.063238 |
| 8                | 6                | 0              | -1.824272               | 1.943706  | -0.049605 |
| 9                | 8                | 0              | -1.438809               | -1.617519 | -0.077517 |
| 10               | 7                | 0              | -2.072944               | 0.591155  | -0.064705 |
| 11               | 7                | 0              | -2.899520               | 2.758131  | -0.075891 |
| 12               | 1                | 0              | -3.055404               | 0.265102  | -0.060508 |
| 13               | 1                | 0              | -3.858967               | 2.411724  | -0.002805 |
| 14               | 1                | 0              | -2.713891               | 3.744090  | 0.003396  |
| 15               | 6                | 0              | 3.760606                | 0.310120  | 0.001468  |
| 16               | 6                | 0              | 4.819202                | 1.197335  | 0.023980  |
| 17               | 6                | 0              | 6.020518                | 0.418868  | 0.030474  |
| 18               | 1                | 0              | 4.751594                | 2.276412  | 0.035055  |
| 19               | 6                | 0              | 5.626161                | -0.952415 | 0.011182  |
| 20               | 7                | 0              | 4.251897                | -0.982005 | -0.005975 |
| 21               | 1                | 0              | 3.643858                | -1.787063 | -0.022728 |
| 22               | 6                | 0              | 6.558537                | -1.995414 | 0.011767  |
| 23               | 6                | 0              | 7.905310                | -1.652795 | 0.031871  |
| 24               | 6                | 0              | 8.318287                | -0.303893 | 0.051072  |
| 25               | 6                | 0              | 7.392459                | 0.730099  | 0.050593  |
| 26               | 1                | 0              | 6.241471                | -3.034013 | -0.003054 |
| 27               | 1                | 0              | 8.654290                | -2.439140 | 0.032745  |
| 28               | 1                | 0              | 9.379752                | -0.074872 | 0.066461  |
| 29               | 1                | 0              | 7.720181                | 1.765845  | 0.065437  |
| 30               | 1                | 0              | 2.151255                | 2.647134  | 0.004808  |
| 31               | 7                | 0              | -7.142056               | 0.057439  | 0.088786  |
| 32               | 6                | 0              | -7.447106               | -1.268690 | 0.070345  |
| 33               | 1                | 0              | -8.500103               | -1.526396 | 0.096326  |
| 34               | 6                | 0              | -6.458826               | -2.195876 | 0.022329  |
| 35               | 1                | 0              | -6.680449               | -3.254966 | 0.007370  |
| 36               | 6                | 0              | -5.100581               | -1.705945 | -0.007559 |
| 37               | 7                | 0              | -4.072559               | -2.558175 | -0.053799 |
| 38               | 1                | 0              | -3.096039               | -2.209473 | -0.062675 |
| 39               | 1                | 0              | -4.241438               | -3.550743 | -0.058199 |
| 40               | 7                | 0              | -4.823711               | -0.395522 | 0.007871  |
| 41               | 6                | 0              | -5.815244               | 0.532991  | 0.058290  |
| 42               | 8                | 0              | -5.632580               | 1.754061  | 0.083451  |
| 43               | 1                | 0              | -7.859656               | 0.767781  | 0.125148  |

2:G Counterpoise Corrected Energy: -1448.268724051841  
BSSE Energy: 0.001192454198

---

| Center<br>Number | Atomic<br>Number | Atomic<br>Type | Coordinates (Angstroms) |           |           |
|------------------|------------------|----------------|-------------------------|-----------|-----------|
|                  |                  |                | X                       | Y         | Z         |
| 1                | 7                | 0              | -2.938622               | 1.685616  | -0.028152 |
| 2                | 6                | 0              | -1.597958               | 1.322936  | 0.022322  |
| 3                | 6                | 0              | -3.677759               | 0.539977  | -0.088409 |
| 4                | 7                | 0              | -1.452571               | 0.005621  | 0.007223  |
| 5                | 6                | 0              | -2.739737               | -0.494598 | -0.060488 |
| 6                | 7                | 0              | -5.027387               | 0.463167  | -0.154415 |
| 7                | 6                | 0              | -3.217997               | -1.840562 | -0.100593 |
| 8                | 6                | 0              | -5.466286               | -0.772545 | -0.219913 |
| 9                | 8                | 0              | -2.609520               | -2.912110 | -0.070173 |
| 10               | 7                | 0              | -4.637076               | -1.867163 | -0.196621 |
| 11               | 7                | 0              | -6.809465               | -1.010468 | -0.369639 |
| 12               | 1                | 0              | -5.019091               | -2.799853 | -0.297600 |
| 13               | 1                | 0              | -7.191685               | -1.857224 | 0.026350  |
| 14               | 1                | 0              | -7.378079               | -0.186760 | -0.231328 |
| 15               | 6                | 0              | -0.565566               | 2.330247  | 0.084692  |
| 16               | 6                | 0              | -0.683105               | 3.671878  | 0.424123  |
| 17               | 6                | 0              | 0.622388                | 4.238405  | 0.334820  |
| 18               | 1                | 0              | -1.585022               | 4.176947  | 0.743521  |
| 19               | 6                | 0              | 1.492442                | 3.183012  | -0.070515 |
| 20               | 7                | 0              | 0.747643                | 2.040943  | -0.208078 |
| 21               | 1                | 0              | 1.123831                | 1.144766  | -0.551054 |
| 22               | 6                | 0              | 2.866774                | 3.378586  | -0.269867 |
| 23               | 6                | 0              | 3.363618                | 4.653638  | -0.048527 |
| 24               | 6                | 0              | 2.521430                | 5.714954  | 0.361487  |
| 25               | 6                | 0              | 1.163539                | 5.521774  | 0.554898  |
| 26               | 1                | 0              | 3.500587                | 2.555429  | -0.583546 |
| 27               | 1                | 0              | 4.423286                | 4.844172  | -0.191273 |
| 28               | 1                | 0              | 2.952771                | 6.698229  | 0.525362  |
| 29               | 1                | 0              | 0.525454                | 6.343423  | 0.868575  |
| 30               | 1                | 0              | -3.298436               | 2.626027  | -0.091405 |
| 31               | 7                | 0              | 4.550661                | -3.853689 | 0.250072  |
| 32               | 6                | 0              | 5.380958                | -2.948658 | -0.393976 |
| 33               | 1                | 0              | 6.434608                | -3.149668 | -0.531989 |
| 34               | 7                | 0              | 4.753234                | -1.874395 | -0.792322 |
| 35               | 6                | 0              | 3.441992                | -2.075863 | -0.395722 |
| 36               | 6                | 0              | 2.287737                | -1.241580 | -0.529221 |
| 37               | 8                | 0              | 2.204079                | -0.122588 | -1.049784 |
| 38               | 7                | 0              | 1.143935                | -1.847489 | 0.039194  |
| 39               | 1                | 0              | 0.287527                | -1.281477 | 0.014529  |
| 40               | 6                | 0              | 1.115860                | -3.084440 | 0.645287  |
| 41               | 7                | 0              | -0.075302               | -3.490973 | 1.156666  |
| 42               | 1                | 0              | -0.943666               | -3.170347 | 0.724038  |
| 43               | 1                | 0              | -0.068278               | -4.454012 | 1.458920  |
| 44               | 7                | 0              | 2.181903                | -3.856151 | 0.779966  |
| 45               | 6                | 0              | 3.295258                | -3.302080 | 0.256945  |
| 46               | 1                | 0              | 4.799502                | -4.747696 | 0.645237  |

---

**Cartesian Coordinates and Absolute Energies (Hartrees) for Monomers when dR=2'-deoxyribose**

G *syn* (Hoogsteen) Monomer Energy: -963.895387

| Center<br>Number | Atomic<br>Number | Atomic<br>Type | Coordinates (Angstroms) |           |           |
|------------------|------------------|----------------|-------------------------|-----------|-----------|
|                  |                  |                | X                       | Y         | Z         |
| 1                | 6                | 0              | 1.354082                | -1.305528 | 0.092520  |
| 2                | 8                | 0              | 1.726065                | -0.432724 | 1.145874  |
| 3                | 1                | 0              | 1.747964                | -2.314776 | 0.272231  |
| 4                | 6                | 0              | 1.965544                | -0.701479 | -1.180810 |
| 5                | 6                | 0              | 2.878048                | 0.359455  | 0.773947  |
| 6                | 6                | 0              | 3.265398                | -0.086863 | -0.649039 |
| 7                | 1                | 0              | 1.314942                | 0.083158  | -1.572011 |
| 8                | 1                | 0              | 2.132465                | -1.450016 | -1.960598 |
| 9                | 6                | 0              | 2.524198                | 1.841233  | 0.904645  |
| 10               | 1                | 0              | 3.700843                | 0.115734  | 1.457119  |
| 11               | 1                | 0              | 3.597397                | 0.763206  | -1.257349 |
| 12               | 1                | 0              | 2.141192                | 2.007950  | 1.923937  |
| 13               | 1                | 0              | 3.441039                | 2.433423  | 0.796772  |
| 14               | 8                | 0              | 1.615365                | 2.286006  | -0.083226 |
| 15               | 1                | 0              | 0.813520                | 1.715862  | -0.030575 |
| 16               | 8                | 0              | 4.299610                | -1.061361 | -0.507743 |
| 17               | 1                | 0              | 4.569672                | -1.337848 | -1.393535 |
| 18               | 7                | 0              | -0.095231               | -1.441030 | 0.079592  |
| 19               | 6                | 0              | -0.817181               | -2.618331 | 0.233463  |
| 20               | 6                | 0              | -1.037481               | -0.444360 | -0.018643 |
| 21               | 7                | 0              | -2.111923               | -2.445155 | 0.220708  |
| 22               | 6                | 0              | -2.272462               | -1.081807 | 0.066253  |
| 23               | 7                | 0              | -0.787068               | 0.885372  | -0.149929 |
| 24               | 6                | 0              | -3.474523               | -0.289094 | -0.004063 |
| 25               | 6                | 0              | -1.869268               | 1.630897  | -0.212630 |
| 26               | 8                | 0              | -4.648929               | -0.604363 | 0.033191  |
| 27               | 7                | 0              | -3.129854               | 1.106283  | -0.148083 |
| 28               | 7                | 0              | -1.733623               | 2.981395  | -0.395778 |
| 29               | 1                | 0              | -3.938033               | 1.707938  | -0.252128 |
| 30               | 1                | 0              | -2.456695               | 3.588896  | -0.040024 |
| 31               | 1                | 0              | -0.786248               | 3.319987  | -0.275250 |
| 32               | 1                | 0              | -0.309179               | -3.566781 | 0.347210  |

G *anti* (Watson-Crick) Monomer Energy: -963.8875439

| Center<br>Number | Atomic<br>Number | Atomic<br>Type | Coordinates (Angstroms) |           |           |
|------------------|------------------|----------------|-------------------------|-----------|-----------|
|                  |                  |                | X                       | Y         | Z         |
| 1                | 8                | 0              | 3.447770                | -1.914606 | 0.270890  |
| 2                | 6                | 0              | 3.952324                | -1.127529 | -0.805723 |
| 3                | 1                | 0              | 3.710657                | -1.577721 | -1.778104 |
| 4                | 1                | 0              | 5.046616                | -1.021467 | -0.738748 |
| 5                | 6                | 0              | 3.325082                | 0.259488  | -0.758253 |
| 6                | 1                | 0              | 3.839509                | 0.893542  | -1.490583 |
| 7                | 8                | 0              | 1.937844                | 0.182103  | -1.116271 |
| 8                | 6                | 0              | 1.105705                | 0.612450  | -0.043065 |
| 9                | 1                | 0              | 0.691152                | 1.602371  | -0.258326 |
| 10               | 7                | 0              | -0.032138               | -0.282312 | 0.058628  |

|    |   |   |           |           |           |
|----|---|---|-----------|-----------|-----------|
| 11 | 6 | 0 | -0.007290 | -1.665820 | 0.184776  |
| 12 | 1 | 0 | 0.934664  | -2.194208 | 0.225764  |
| 13 | 7 | 0 | -1.200374 | -2.201784 | 0.217714  |
| 14 | 6 | 0 | -2.065389 | -1.129874 | 0.103809  |
| 15 | 6 | 0 | -3.504164 | -1.092294 | 0.090335  |
| 16 | 8 | 0 | -4.336726 | -1.977577 | 0.183869  |
| 17 | 7 | 0 | -3.946213 | 0.271420  | -0.054043 |
| 18 | 1 | 0 | -4.952483 | 0.373219  | -0.003332 |
| 19 | 6 | 0 | -3.147845 | 1.380056  | -0.161872 |
| 20 | 7 | 0 | -3.783293 | 2.602042  | -0.237919 |
| 21 | 1 | 0 | -4.660756 | 2.631264  | -0.738935 |
| 22 | 1 | 0 | -3.149312 | 3.349389  | -0.486269 |
| 23 | 7 | 0 | -1.837677 | 1.333131  | -0.145621 |
| 24 | 6 | 0 | -1.359622 | 0.068308  | -0.003648 |
| 25 | 6 | 0 | 3.382611  | 0.948845  | 0.617919  |
| 26 | 1 | 0 | 4.198602  | 0.552824  | 1.236445  |
| 27 | 6 | 0 | 2.005757  | 0.629068  | 1.202952  |
| 28 | 1 | 0 | 2.021125  | -0.360889 | 1.663669  |
| 29 | 1 | 0 | 1.672362  | 1.360521  | 1.944853  |
| 30 | 8 | 0 | 3.557228  | 2.342104  | 0.364333  |
| 31 | 1 | 0 | 3.521965  | 2.804277  | 1.212303  |
| 32 | 1 | 0 | 3.751836  | -2.822996 | 0.154008  |

1 *anti* Monomer Energy: -1172.9395688

| Center Number | Atomic Number | Atomic Type | Coordinates (Angstroms) |           |           |
|---------------|---------------|-------------|-------------------------|-----------|-----------|
|               |               |             | X                       | Y         | Z         |
| 1             | 6             | 0           | -0.544574               | -1.136001 | 0.224789  |
| 2             | 8             | 0           | -1.425260               | -1.136998 | -0.898707 |
| 3             | 1             | 0           | 0.032947                | -2.067606 | 0.228461  |
| 4             | 6             | 0           | -1.462192               | -1.080724 | 1.463620  |
| 5             | 6             | 0           | -2.497440               | -2.010726 | -0.533376 |
| 6             | 6             | 0           | -2.779022               | -1.724590 | 0.959419  |
| 7             | 1             | 0           | -1.612950               | -0.050310 | 1.789636  |
| 8             | 1             | 0           | -1.040880               | -1.655425 | 2.292066  |
| 9             | 6             | 0           | -3.658967               | -1.781063 | -1.488786 |
| 10            | 1             | 0           | -2.173009               | -3.062456 | -0.602207 |
| 11            | 1             | 0           | -3.613877               | -1.019182 | 1.048940  |
| 12            | 1             | 0           | -3.368056               | -2.107525 | -2.497761 |
| 13            | 1             | 0           | -4.502353               | -2.399786 | -1.166367 |
| 14            | 8             | 0           | -4.107670               | -0.435482 | -1.491844 |
| 15            | 1             | 0           | -3.372310               | 0.102166  | -1.818682 |
| 16            | 8             | 0           | -3.106106               | -2.968085 | 1.569552  |
| 17            | 1             | 0           | -3.510713               | -2.784695 | 2.426631  |
| 18            | 7             | 0           | 0.450207                | -0.093641 | 0.090338  |
| 19            | 6             | 0           | 0.363749                | 1.307819  | 0.070039  |
| 20            | 6             | 0           | 1.799612                | -0.386159 | -0.004719 |
| 21            | 7             | 0           | 1.557233                | 1.870261  | -0.014980 |
| 22            | 6             | 0           | 2.457407                | 0.835772  | -0.059775 |
| 23            | 7             | 0           | 2.328818                | -1.635321 | -0.032829 |
| 24            | 6             | 0           | 3.894707                | 0.855689  | -0.141676 |
| 25            | 6             | 0           | 3.638890                | -1.636761 | -0.106593 |
| 26            | 8             | 0           | 4.682870                | 1.785055  | -0.183342 |
| 27            | 7             | 0           | 4.392148                | -0.493143 | -0.161495 |

|    |   |   |           |           |           |
|----|---|---|-----------|-----------|-----------|
| 28 | 7 | 0 | 4.319402  | -2.834069 | -0.076425 |
| 29 | 1 | 0 | 5.403316  | -0.549081 | -0.151174 |
| 30 | 1 | 0 | 5.181452  | -2.889541 | -0.600918 |
| 31 | 1 | 0 | 3.710261  | -3.630564 | -0.203954 |
| 32 | 6 | 0 | -0.823686 | 2.138604  | 0.133820  |
| 33 | 6 | 0 | -2.202166 | 1.954450  | 0.068399  |
| 34 | 6 | 0 | -2.808046 | 3.233641  | 0.159525  |
| 35 | 1 | 0 | -2.718311 | 1.018536  | -0.060467 |
| 36 | 6 | 0 | -1.793704 | 4.165834  | 0.273538  |
| 37 | 7 | 0 | -0.605966 | 3.494823  | 0.259151  |
| 38 | 1 | 0 | 0.329172  | 3.876316  | 0.290731  |
| 39 | 1 | 0 | -1.828172 | 5.241203  | 0.364557  |
| 40 | 1 | 0 | -3.867504 | 3.444951  | 0.139562  |

1 *syn* Monomer Energy: -1172.9475542

| Center Number | Atomic Number | Atomic Type | Coordinates (Angstroms) |           |           |
|---------------|---------------|-------------|-------------------------|-----------|-----------|
|               |               |             | X                       | Y         | Z         |
| 1             | 6             | 0           | 0.143374                | -1.385316 | 0.074148  |
| 2             | 8             | 0           | -0.650288               | -1.744738 | -1.048618 |
| 3             | 1             | 0           | 1.100512                | -1.908114 | 0.054155  |
| 4             | 6             | 0           | -0.660196               | -1.829331 | 1.306426  |
| 5             | 6             | 0           | -1.577493               | -2.797068 | -0.696427 |
| 6             | 6             | 0           | -1.328920               | -3.109430 | 0.792553  |
| 7             | 1             | 0           | -1.418616               | -1.087561 | 1.560523  |
| 8             | 1             | 0           | -0.020640               | -2.000928 | 2.177137  |
| 9             | 6             | 0           | -2.997337               | -2.333535 | -1.023715 |
| 10            | 1             | 0           | -1.335945               | -3.688631 | -1.288467 |
| 11            | 1             | 0           | -2.267242               | -3.324503 | 1.318396  |
| 12            | 1             | 0           | -3.015443               | -2.020350 | -2.079700 |
| 13            | 1             | 0           | -3.680964               | -3.185017 | -0.920718 |
| 14            | 8             | 0           | -3.458314               | -1.312773 | -0.160037 |
| 15            | 1             | 0           | -2.794327               | -0.585516 | -0.179711 |
| 16            | 8             | 0           | -0.442383               | -4.228790 | 0.832902  |
| 17            | 1             | 0           | -0.265037               | -4.433125 | 1.760756  |
| 18            | 7             | 0           | 0.447017                | 0.038216  | 0.002256  |
| 19            | 6             | 0           | 1.701165                | 0.659366  | -0.051348 |
| 20            | 6             | 0           | -0.474010               | 1.063614  | 0.037816  |
| 21            | 7             | 0           | 1.606644                | 1.976478  | -0.012796 |
| 22            | 6             | 0           | 0.259599                | 2.243808  | 0.040592  |
| 23            | 7             | 0           | -1.825073               | 0.923372  | 0.041562  |
| 24            | 6             | 0           | -0.437114               | 3.504379  | 0.074292  |
| 25            | 6             | 0           | -2.487078               | 2.060281  | 0.066660  |
| 26            | 8             | 0           | -0.021264               | 4.648975  | 0.101455  |
| 27            | 7             | 0           | -1.860984               | 3.275202  | 0.083143  |
| 28            | 7             | 0           | -3.855915               | 2.030575  | 0.125309  |
| 29            | 1             | 0           | -2.403619               | 4.127364  | 0.155690  |
| 30            | 1             | 0           | -4.367359               | 2.802864  | -0.275724 |
| 31            | 1             | 0           | -4.254756               | 1.114805  | -0.047524 |
| 32            | 6             | 0           | 2.993856                | 0.002326  | -0.119243 |
| 33            | 6             | 0           | 3.472020                | -1.250051 | -0.496844 |
| 34            | 6             | 0           | 4.886282                | -1.212676 | -0.400994 |
| 35            | 1             | 0           | 2.886182                | -2.084367 | -0.851953 |
| 36            | 6             | 0           | 5.239925                | 0.054548  | 0.022960  |
| 37            | 7             | 0           | 4.092904                | 0.774303  | 0.192000  |

|    |   |   |          |           |           |
|----|---|---|----------|-----------|-----------|
| 38 | 1 | 0 | 4.002673 | 1.750516  | 0.435138  |
| 39 | 1 | 0 | 6.208447 | 0.490055  | 0.217719  |
| 40 | 1 | 0 | 5.567534 | -2.021389 | -0.622914 |

**2** *anti* Monomer Energy: -1326.631703

| Center<br>Number | Atomic<br>Number | Atomic<br>Type | Coordinates (Angstroms) |           |           |
|------------------|------------------|----------------|-------------------------|-----------|-----------|
|                  |                  |                | X                       | Y         | Z         |
| 1                | 6                | 0              | -0.909356               | 1.558128  | 0.230761  |
| 2                | 8                | 0              | -0.186135               | 2.049658  | -0.895664 |
| 3                | 1                | 0              | -1.900127               | 2.026288  | 0.254923  |
| 4                | 6                | 0              | -0.092198               | 1.991589  | 1.464972  |
| 5                | 6                | 0              | 0.249381                | 3.360115  | -0.519837 |
| 6                | 6                | 0              | 0.657420                | 3.254138  | 0.967420  |
| 7                | 1                | 0              | 0.598642                | 1.203867  | 1.769769  |
| 8                | 1                | 0              | -0.746115               | 2.233866  | 2.306261  |
| 9                | 6                | 0              | 1.340865                | 3.807805  | -1.480977 |
| 10               | 1                | 0              | -0.592145               | 4.070817  | -0.572215 |
| 11               | 1                | 0              | 1.742334                | 3.114150  | 1.043608  |
| 12               | 1                | 0              | 0.911171                | 3.931752  | -2.485265 |
| 13               | 1                | 0              | 1.712237                | 4.783567  | -1.152348 |
| 14               | 8                | 0              | 2.452307                | 2.926153  | -1.500875 |
| 15               | 1                | 0              | 2.138170                | 2.087569  | -1.867489 |
| 16               | 8                | 0              | 0.263022                | 4.467366  | 1.598027  |
| 17               | 1                | 0              | 0.720981                | 4.527670  | 2.445696  |
| 18               | 7                | 0              | -1.182744               | 0.142985  | 0.080715  |
| 19               | 6                | 0              | -0.353124               | -0.989458 | 0.031904  |
| 20               | 6                | 0              | -2.475932               | -0.339681 | 0.003405  |
| 21               | 7                | 0              | -1.054531               | -2.106807 | -0.053219 |
| 22               | 6                | 0              | -2.369882               | -1.723883 | -0.069655 |
| 23               | 7                | 0              | -3.598000               | 0.421823  | 0.031029  |
| 24               | 6                | 0              | -3.569064               | -2.517130 | -0.160390 |
| 25               | 6                | 0              | -4.701207               | -0.284066 | -0.060828 |
| 26               | 8                | 0              | -3.727699               | -3.722447 | -0.243525 |
| 27               | 7                | 0              | -4.716795               | -1.651647 | -0.151333 |
| 28               | 7                | 0              | -5.913979               | 0.360988  | -0.122106 |
| 29               | 1                | 0              | -5.592476               | -2.143037 | -0.283714 |
| 30               | 1                | 0              | -6.716503               | -0.107524 | 0.273898  |
| 31               | 1                | 0              | -5.851027               | 1.343994  | 0.103184  |
| 32               | 6                | 0              | 1.097165                | -1.051763 | 0.061377  |
| 33               | 6                | 0              | 2.129424                | -0.134190 | -0.018364 |
| 34               | 6                | 0              | 3.355738                | -0.870143 | 0.033842  |
| 35               | 1                | 0              | 2.034675                | 0.931250  | -0.135377 |
| 36               | 6                | 0              | 3.010498                | -2.248361 | 0.142549  |
| 37               | 7                | 0              | 1.640510                | -2.323636 | 0.161715  |
| 38               | 1                | 0              | 1.056971                | -3.147366 | 0.184286  |
| 39               | 6                | 0              | 3.980483                | -3.255611 | 0.212065  |
| 40               | 6                | 0              | 5.312499                | -2.863884 | 0.170012  |
| 41               | 6                | 0              | 5.677000                | -1.504026 | 0.061317  |
| 42               | 6                | 0              | 4.714865                | -0.507059 | -0.007248 |
| 43               | 1                | 0              | 3.702320                | -4.302034 | 0.294120  |
| 44               | 1                | 0              | 6.090391                | -3.620014 | 0.220489  |
| 45               | 1                | 0              | 6.729652                | -1.239114 | 0.029845  |
| 46               | 1                | 0              | 5.000217                | 0.537404  | -0.094928 |

2 *syn* Monomer Energy: -1326.6396375

---

| Center<br>Number | Atomic<br>Number | Atomic<br>Type | Coordinates (Angstroms) |           |           |
|------------------|------------------|----------------|-------------------------|-----------|-----------|
|                  |                  |                | X                       | Y         | Z         |
| 1                | 6                | 0              | -0.597015               | -1.328301 | 0.148214  |
| 2                | 8                | 0              | -1.283016               | -1.822247 | -0.993483 |
| 3                | 1                | 0              | 0.420088                | -1.720590 | 0.189328  |
| 4                | 6                | 0              | -1.392482               | -1.834329 | 1.361526  |
| 5                | 6                | 0              | -2.085536               | -2.973313 | -0.641764 |
| 6                | 6                | 0              | -1.865193               | -3.206572 | 0.865567  |
| 7                | 1                | 0              | -2.252014               | -1.191602 | 1.556521  |
| 8                | 1                | 0              | -0.776387               | -1.894903 | 2.263323  |
| 9                | 6                | 0              | -3.536349               | -2.705664 | -1.042175 |
| 10               | 1                | 0              | -1.706873               | -3.843358 | -1.192161 |
| 11               | 1                | 0              | -2.790031               | -3.526790 | 1.360817  |
| 12               | 1                | 0              | -3.547590               | -2.429100 | -2.108390 |
| 13               | 1                | 0              | -4.110309               | -3.634161 | -0.936349 |
| 14               | 8                | 0              | -4.161830               | -1.727069 | -0.234361 |
| 15               | 1                | 0              | -3.596137               | -0.921828 | -0.250455 |
| 16               | 8                | 0              | -0.843570               | -4.197716 | 0.979742  |
| 17               | 1                | 0              | -0.684009               | -4.353336 | 1.920306  |
| 18               | 7                | 0              | -0.475942               | 0.121191  | 0.036389  |
| 19               | 6                | 0              | 0.689778                | 0.896094  | 0.002130  |
| 20               | 6                | 0              | -1.518408               | 1.021512  | 0.028578  |
| 21               | 7                | 0              | 0.429873                | 2.190804  | 0.018007  |
| 22               | 6                | 0              | -0.939629               | 2.286162  | 0.030463  |
| 23               | 7                | 0              | -2.840007               | 0.711897  | -0.001308 |
| 24               | 6                | 0              | -1.790716               | 3.449579  | 0.027628  |
| 25               | 6                | 0              | -3.640427               | 1.757005  | -0.012186 |
| 26               | 8                | 0              | -1.522450               | 4.636866  | 0.047838  |
| 27               | 7                | 0              | -3.173605               | 3.041963  | 0.003306  |
| 28               | 7                | 0              | -4.993801               | 1.554547  | 0.006785  |
| 29               | 1                | 0              | -3.821452               | 3.819426  | 0.047316  |
| 30               | 1                | 0              | -5.591689               | 2.255476  | -0.405013 |
| 31               | 1                | 0              | -5.272021               | 0.594274  | -0.159303 |
| 32               | 6                | 0              | 2.057410                | 0.407976  | -0.046913 |
| 33               | 6                | 0              | 2.659307                | -0.775974 | -0.435654 |
| 34               | 6                | 0              | 4.073699                | -0.588128 | -0.323788 |
| 35               | 1                | 0              | 2.165981                | -1.657317 | -0.816239 |
| 36               | 6                | 0              | 4.281593                | 0.744924  | 0.134813  |
| 37               | 7                | 0              | 3.044220                | 1.316550  | 0.300795  |
| 38               | 1                | 0              | 2.827868                | 2.276072  | 0.527976  |
| 39               | 6                | 0              | 5.562235                | 1.269161  | 0.346760  |
| 40               | 6                | 0              | 6.644106                | 0.436743  | 0.091103  |
| 41               | 6                | 0              | 6.461756                | -0.887511 | -0.363480 |
| 42               | 6                | 0              | 5.192120                | -1.405641 | -0.571891 |
| 43               | 1                | 0              | 5.703904                | 2.287694  | 0.695538  |
| 44               | 1                | 0              | 7.651547                | 0.812517  | 0.243170  |
| 45               | 1                | 0              | 7.333282                | -1.507120 | -0.552399 |
| 46               | 1                | 0              | 5.060111                | -2.425039 | -0.923260 |

---



**Cartesian Coordinates and Absolute Energies (Hartrees) for H-bonded Complexes when dR=2'-deoxyribose**

G:C Counterpoise Corrected Energy: -1359.001156933865

BSSE energy: 0.001051541185

---

| Center<br>Number | Atomic<br>Number | Atomic<br>Type | Coordinates (Angstroms) |           |           |
|------------------|------------------|----------------|-------------------------|-----------|-----------|
|                  |                  |                | X                       | Y         | Z         |
| 1                | 8                | 0              | -5.891192               | -1.766972 | -0.139666 |
| 2                | 6                | 0              | -6.325175               | -0.907004 | 0.911692  |
| 3                | 1                | 0              | -6.092954               | -1.331937 | 1.897677  |
| 4                | 1                | 0              | -7.412286               | -0.736291 | 0.858894  |
| 5                | 6                | 0              | -5.614298               | 0.435369  | 0.797825  |
| 6                | 1                | 0              | -6.076668               | 1.128220  | 1.511889  |
| 7                | 8                | 0              | -4.229687               | 0.285124  | 1.135234  |
| 8                | 6                | 0              | -3.390757               | 0.628788  | 0.032829  |
| 9                | 1                | 0              | -2.919747               | 1.601850  | 0.204235  |
| 10               | 7                | 0              | -2.307450               | -0.328159 | -0.052566 |
| 11               | 6                | 0              | -2.407290               | -1.715827 | -0.109320 |
| 12               | 1                | 0              | -3.376654               | -2.193661 | -0.096620 |
| 13               | 7                | 0              | -1.247528               | -2.315779 | -0.152332 |
| 14               | 6                | 0              | -0.322841               | -1.284087 | -0.120720 |
| 15               | 6                | 0              | 1.106249                | -1.302954 | -0.141067 |
| 16               | 8                | 0              | 1.869031                | -2.280935 | -0.197782 |
| 17               | 7                | 0              | 1.637477                | 0.001090  | -0.085779 |
| 18               | 1                | 0              | 2.669202                | 0.059877  | -0.075045 |
| 19               | 6                | 0              | 0.907755                | 1.164094  | -0.021617 |
| 20               | 7                | 0              | 1.608769                | 2.320052  | 0.001221  |
| 21               | 1                | 0              | 2.625676                | 2.344253  | 0.098587  |
| 22               | 1                | 0              | 1.073754                | 3.160218  | 0.144717  |
| 23               | 7                | 0              | -0.417067               | 1.192791  | -0.004037 |
| 24               | 6                | 0              | -0.961104               | -0.041763 | -0.050512 |
| 25               | 6                | 0              | -5.657896               | 1.072343  | -0.604094 |
| 26               | 1                | 0              | -6.507093               | 0.700826  | -1.192917 |
| 27               | 6                | 0              | -4.312889               | 0.650140  | -1.197209 |
| 28               | 1                | 0              | -4.393890               | -0.355065 | -1.616628 |
| 29               | 1                | 0              | -3.950604               | 1.330132  | -1.973925 |
| 30               | 8                | 0              | -5.749321               | 2.482534  | -0.404377 |
| 31               | 1                | 0              | -5.671960               | 2.908992  | -1.268110 |
| 32               | 1                | 0              | -6.229719               | -2.654014 | 0.032439  |
| 33               | 7                | 0              | 6.558180                | 1.340451  | 0.204403  |
| 34               | 6                | 0              | 7.323591                | 0.217293  | 0.134359  |
| 35               | 1                | 0              | 8.397613                | 0.356742  | 0.189488  |
| 36               | 6                | 0              | 6.740054                | -0.999481 | 0.003178  |
| 37               | 1                | 0              | 7.330940                | -1.904395 | -0.053008 |
| 38               | 6                | 0              | 5.296763                | -1.032574 | -0.055401 |
| 39               | 7                | 0              | 4.649732                | -2.194593 | -0.179752 |
| 40               | 1                | 0              | 3.611008                | -2.226961 | -0.196066 |
| 41               | 1                | 0              | 5.169606                | -3.055958 | -0.220723 |
| 42               | 7                | 0              | 4.563961                | 0.086401  | 0.010667  |
| 43               | 6                | 0              | 5.148822                | 1.305381  | 0.145432  |
| 44               | 8                | 0              | 4.535847                | 2.374583  | 0.219739  |
| 45               | 1                | 0              | 6.967928                | 2.258409  | 0.304912  |

---

G:G Counterpoise Corrected Energy: -1506.663759671083  
BSSE Energy: 0.000779094525

---

| Center<br>Number | Atomic<br>Number | Atomic<br>Type | Coordinates (Angstroms) |           |           |
|------------------|------------------|----------------|-------------------------|-----------|-----------|
|                  |                  |                | X                       | Y         | Z         |
| 1                | 6                | 0              | 2.525263                | -1.670328 | 0.107910  |
| 2                | 8                | 0              | 3.456569                | -1.396109 | 1.138208  |
| 3                | 1                | 0              | 1.966437                | -2.590207 | 0.321416  |
| 4                | 6                | 0              | 3.356902                | -1.816503 | -1.174338 |
| 5                | 6                | 0              | 4.779627                | -1.852028 | 0.764984  |
| 6                | 6                | 0              | 4.641530                | -2.463538 | -0.643202 |
| 7                | 1                | 0              | 3.580916                | -0.832003 | -1.590848 |
| 8                | 1                | 0              | 2.852951                | -2.420121 | -1.934177 |
| 9                | 6                | 0              | 5.751424                | -0.676733 | 0.866321  |
| 10               | 1                | 0              | 5.083180                | -2.641596 | 1.462887  |
| 11               | 1                | 0              | 5.509987                | -2.225501 | -1.269501 |
| 12               | 1                | 0              | 5.673998                | -0.260804 | 1.883229  |
| 13               | 1                | 0              | 6.773997                | -1.052013 | 0.741234  |
| 14               | 8                | 0              | 5.538500                | 0.308999  | -0.126223 |
| 15               | 1                | 0              | 4.603906                | 0.603968  | -0.053409 |
| 16               | 8                | 0              | 4.497059                | -3.871269 | -0.463940 |
| 17               | 1                | 0              | 4.418331                | -4.278465 | -1.336934 |
| 18               | 7                | 0              | 1.532675                | -0.599045 | 0.080851  |
| 19               | 6                | 0              | 0.161061                | -0.749830 | 0.205641  |
| 20               | 6                | 0              | 1.758427                | 0.755576  | -0.024166 |
| 21               | 7                | 0              | -0.473848               | 0.394670  | 0.174512  |
| 22               | 6                | 0              | 0.504506                | 1.350287  | 0.033651  |
| 23               | 7                | 0              | 2.955320                | 1.383354  | -0.145500 |
| 24               | 6                | 0              | 0.383294                | 2.772713  | -0.068453 |
| 25               | 6                | 0              | 2.871742                | 2.694028  | -0.230276 |
| 26               | 8                | 0              | -0.617872               | 3.481012  | -0.069014 |
| 27               | 7                | 0              | 1.676018                | 3.368825  | -0.196177 |
| 28               | 7                | 0              | 4.015593                | 3.419615  | -0.406851 |
| 29               | 1                | 0              | 1.656212                | 4.373845  | -0.322281 |
| 30               | 1                | 0              | 4.045497                | 4.375244  | -0.084917 |
| 31               | 1                | 0              | 4.869347                | 2.887763  | -0.286543 |
| 32               | 7                | 0              | -7.174192               | -0.615050 | -0.147298 |
| 33               | 6                | 0              | -7.118865               | -1.999494 | -0.169198 |
| 34               | 1                | 0              | -8.015381               | -2.599020 | -0.250806 |
| 35               | 7                | 0              | -5.899067               | -2.460837 | -0.082190 |
| 36               | 6                | 0              | -5.105001               | -1.329745 | 0.002909  |
| 37               | 6                | 0              | -3.677449               | -1.188866 | 0.113969  |
| 38               | 8                | 0              | -2.796464               | -2.046511 | 0.158028  |
| 39               | 7                | 0              | -3.324173               | 0.185393  | 0.174002  |
| 40               | 1                | 0              | -2.309200               | 0.355712  | 0.231075  |
| 41               | 6                | 0              | -4.181974               | 1.249589  | 0.125212  |
| 42               | 7                | 0              | -3.631363               | 2.490745  | 0.232418  |
| 43               | 1                | 0              | -2.638155               | 2.654105  | 0.104009  |
| 44               | 1                | 0              | -4.257512               | 3.257481  | 0.047048  |
| 45               | 7                | 0              | -5.495194               | 1.128478  | 0.015027  |
| 46               | 6                | 0              | -5.881343               | -0.167282 | -0.036282 |
| 47               | 1                | 0              | -7.992440               | -0.027829 | -0.197586 |
| 48               | 1                | 0              | -0.331662               | -1.709639 | 0.299987  |

---

1:C Counterpoise Corrected Energy: -1568.053709224956  
BSSE Energy: 0.001081686001

---

| Center<br>Number | Atomic<br>Number | Atomic<br>Type | Coordinates (Angstroms) |           |           |
|------------------|------------------|----------------|-------------------------|-----------|-----------|
|                  |                  |                | X                       | Y         | Z         |
| 1                | 6                | 0              | 2.570392                | -1.141129 | -0.236408 |
| 2                | 8                | 0              | 3.413013                | -1.205949 | 0.917255  |
| 3                | 1                | 0              | 1.931732                | -2.031625 | -0.262162 |
| 4                | 6                | 0              | 3.533476                | -1.146281 | -1.443045 |
| 5                | 6                | 0              | 4.432823                | -2.149245 | 0.581534  |
| 6                | 6                | 0              | 4.792682                | -1.863382 | -0.893661 |
| 7                | 1                | 0              | 3.754926                | -0.128138 | -1.767562 |
| 8                | 1                | 0              | 3.106799                | -1.699978 | -2.283111 |
| 9                | 6                | 0              | 5.567823                | -2.016736 | 1.585799  |
| 10               | 1                | 0              | 4.032629                | -3.176304 | 0.620630  |
| 11               | 1                | 0              | 5.665879                | -1.201112 | -0.937692 |
| 12               | 1                | 0              | 5.213435                | -2.337788 | 2.576151  |
| 13               | 1                | 0              | 6.378882                | -2.687760 | 1.285698  |
| 14               | 8                | 0              | 6.108891                | -0.705991 | 1.632822  |
| 15               | 1                | 0              | 5.395183                | -0.121873 | 1.926606  |
| 16               | 8                | 0              | 5.083688                | -3.115330 | -1.505910 |
| 17               | 1                | 0              | 5.518372                | -2.941287 | -2.350080 |
| 18               | 7                | 0              | 1.643591                | -0.037531 | -0.133522 |
| 19               | 6                | 0              | 1.819710                | 1.358025  | -0.106958 |
| 20               | 6                | 0              | 0.273843                | -0.244564 | -0.100221 |
| 21               | 7                | 0              | 0.666280                | 1.998219  | -0.072911 |
| 22               | 6                | 0              | -0.303850               | 1.022835  | -0.071867 |
| 23               | 7                | 0              | -0.332561               | -1.447204 | -0.115283 |
| 24               | 6                | 0              | -1.730693               | 1.116196  | -0.044901 |
| 25               | 6                | 0              | -1.656069               | -1.356469 | -0.089720 |
| 26               | 8                | 0              | -2.436832               | 2.137213  | -0.018030 |
| 27               | 7                | 0              | -2.327691               | -0.158239 | -0.053922 |
| 28               | 7                | 0              | -2.409150               | -2.476031 | -0.108766 |
| 29               | 1                | 0              | -3.361788               | -0.166800 | -0.027544 |
| 30               | 1                | 0              | -3.429337               | -2.460465 | -0.044568 |
| 31               | 1                | 0              | -1.914295               | -3.351797 | -0.089712 |
| 32               | 6                | 0              | 3.064217                | 2.104297  | -0.117577 |
| 33               | 6                | 0              | 4.420722                | 1.822480  | 0.012624  |
| 34               | 6                | 0              | 5.121053                | 3.055018  | -0.053561 |
| 35               | 1                | 0              | 4.858820                | 0.851530  | 0.167079  |
| 36               | 6                | 0              | 4.183109                | 4.056654  | -0.216591 |
| 37               | 7                | 0              | 2.950216                | 3.471127  | -0.257181 |
| 38               | 1                | 0              | 2.046342                | 3.916149  | -0.332283 |
| 39               | 7                | 0              | -7.298971               | -1.282576 | 0.144197  |
| 40               | 6                | 0              | -8.010954               | -0.123373 | 0.180593  |
| 41               | 1                | 0              | -9.090160               | -0.217126 | 0.229926  |
| 42               | 6                | 0              | -7.371320               | 1.071976  | 0.155392  |
| 43               | 1                | 0              | -7.919383               | 2.004663  | 0.184170  |
| 44               | 6                | 0              | -5.928802               | 1.042943  | 0.089500  |
| 45               | 7                | 0              | -5.227105               | 2.179582  | 0.062659  |
| 46               | 1                | 0              | -4.189911               | 2.160848  | 0.027374  |
| 47               | 1                | 0              | -5.703763               | 3.065800  | 0.096730  |
| 48               | 7                | 0              | -5.248753               | -0.110273 | 0.052357  |
| 49               | 6                | 0              | -5.890333               | -1.307977 | 0.079508  |
| 50               | 8                | 0              | -5.327550               | -2.406710 | 0.051901  |
| 51               | 1                | 0              | -7.751432               | -2.185753 | 0.163411  |

|    |   |   |          |          |           |
|----|---|---|----------|----------|-----------|
| 52 | 1 | 0 | 4.298363 | 5.126309 | -0.308561 |
| 53 | 1 | 0 | 6.191064 | 3.189518 | 0.015168  |

---

1:G Counterpoise Corrected Energy: -1715.723273018754  
BSSE Energy: 0.001156798156

---

| Center<br>Number | Atomic<br>Number | Atomic<br>Type | Coordinates (Angstroms) |           |           |
|------------------|------------------|----------------|-------------------------|-----------|-----------|
|                  |                  |                | X                       | Y         | Z         |
| 1                | 6                | 0              | -3.023521               | -1.191358 | 0.083270  |
| 2                | 8                | 0              | -4.002964               | -0.880314 | -0.900378 |
| 3                | 1                | 0              | -2.672632               | -2.218167 | -0.029922 |
| 4                | 6                | 0              | -3.728044               | -1.022351 | 1.437449  |
| 5                | 6                | 0              | -5.332724               | -1.054471 | -0.357706 |
| 6                | 6                | 0              | -5.146106               | -1.503046 | 1.105702  |
| 7                | 1                | 0              | -3.750926               | 0.025867  | 1.738965  |
| 8                | 1                | 0              | -3.251094               | -1.611530 | 2.225882  |
| 9                | 6                | 0              | -6.111301               | 0.248993  | -0.534462 |
| 10               | 1                | 0              | -5.833965               | -1.858846 | -0.909980 |
| 11               | 1                | 0              | -5.898056               | -1.048515 | 1.762663  |
| 12               | 1                | 0              | -6.077090               | 0.523099  | -1.600774 |
| 13               | 1                | 0              | -7.161606               | 0.074313  | -0.272434 |
| 14               | 8                | 0              | -5.636383               | 1.293499  | 0.294888  |
| 15               | 1                | 0              | -4.669943               | 1.376034  | 0.139490  |
| 16               | 8                | 0              | -5.244649               | -2.926565 | 1.109057  |
| 17               | 1                | 0              | -5.104028               | -3.233988 | 2.014525  |
| 18               | 7                | 0              | -1.857684               | -0.337078 | -0.130333 |
| 19               | 6                | 0              | -0.534361               | -0.734236 | -0.386295 |
| 20               | 6                | 0              | -1.830915               | 1.030217  | -0.012278 |
| 21               | 7                | 0              | 0.294450                | 0.300583  | -0.385700 |
| 22               | 6                | 0              | -0.500092               | 1.405012  | -0.156664 |
| 23               | 7                | 0              | -2.901108               | 1.840005  | 0.178663  |
| 24               | 6                | 0              | -0.170125               | 2.795887  | -0.117775 |
| 25               | 6                | 0              | -2.612641               | 3.121427  | 0.240397  |
| 26               | 8                | 0              | 0.913774                | 3.366407  | -0.244597 |
| 27               | 7                | 0              | -1.332379               | 3.590618  | 0.107524  |
| 28               | 7                | 0              | -3.613225               | 4.019268  | 0.488808  |
| 29               | 1                | 0              | -1.137791               | 4.581148  | 0.191542  |
| 30               | 1                | 0              | -3.516612               | 4.963289  | 0.145770  |
| 31               | 1                | 0              | -4.546145               | 3.627255  | 0.430522  |
| 32               | 6                | 0              | -0.158902               | -2.107399 | -0.652350 |
| 33               | 6                | 0              | -0.811923               | -3.116360 | -1.365680 |
| 34               | 6                | 0              | 0.053222                | -4.232582 | -1.398722 |
| 35               | 1                | 0              | -1.772546               | -3.027273 | -1.853475 |
| 36               | 6                | 0              | 1.201954                | -3.876479 | -0.708732 |
| 37               | 7                | 0              | 1.069098                | -2.596022 | -0.270780 |
| 38               | 1                | 0              | 1.780083                | -2.094098 | 0.284729  |
| 39               | 7                | 0              | 7.343400                | 0.320690  | 0.259392  |
| 40               | 6                | 0              | 7.463157                | -0.845816 | 0.999498  |
| 41               | 1                | 0              | 8.429809                | -1.224186 | 1.302963  |
| 42               | 7                | 0              | 6.311006                | -1.399917 | 1.268697  |
| 43               | 6                | 0              | 5.379978                | -0.560122 | 0.680932  |
| 44               | 6                | 0              | 3.953521                | -0.650647 | 0.610203  |
| 45               | 8                | 0              | 3.215291                | -1.526308 | 1.078537  |
| 46               | 7                | 0              | 3.403787                | 0.432663  | -0.112067 |
| 47               | 1                | 0              | 2.383202                | 0.408373  | -0.237941 |

|    |   |   |           |           |           |
|----|---|---|-----------|-----------|-----------|
| 48 | 6 | 0 | 4.124148  | 1.461803  | -0.675985 |
| 49 | 7 | 0 | 3.415357  | 2.409596  | -1.346444 |
| 50 | 1 | 0 | 2.472813  | 2.633266  | -1.023274 |
| 51 | 1 | 0 | 3.978283  | 3.204000  | -1.613827 |
| 52 | 7 | 0 | 5.443372  | 1.544592  | -0.625706 |
| 53 | 6 | 0 | 6.003036  | 0.516720  | 0.045533  |
| 54 | 1 | 0 | 8.082750  | 0.922669  | -0.069719 |
| 55 | 1 | 0 | 2.097720  | -4.439332 | -0.491760 |
| 56 | 1 | 0 | -0.135447 | -5.183280 | -1.876385 |

2:C Counterpoise Corrected Energy: -1721.746488808867

BSSE Energy: 0.001078116843

| Center<br>Number | Atomic<br>Number | Atomic<br>Type | Coordinates (Angstroms) |           |           |
|------------------|------------------|----------------|-------------------------|-----------|-----------|
|                  |                  |                | X                       | Y         | Z         |
| 1                | 6                | 0              | 1.665842                | -1.937530 | -0.248860 |
| 2                | 8                | 0              | 2.472129                | -2.158118 | 0.909548  |
| 3                | 1                | 0              | 0.886489                | -2.706745 | -0.294728 |
| 4                | 6                | 0              | 2.624937                | -2.085851 | -1.448224 |
| 5                | 6                | 0              | 3.326342                | -3.253231 | 0.569017  |
| 6                | 6                | 0              | 3.733865                | -3.021827 | -0.904033 |
| 7                | 1                | 0              | 3.024951                | -1.115985 | -1.748510 |
| 8                | 1                | 0              | 2.117324                | -2.539175 | -2.303295 |
| 9                | 6                | 0              | 4.466105                | -3.313922 | 1.575264  |
| 10               | 1                | 0              | 2.763879                | -4.201328 | 0.601476  |
| 11               | 1                | 0              | 4.711420                | -2.525926 | -0.942441 |
| 12               | 1                | 0              | 4.063111                | -3.578122 | 2.563599  |
| 13               | 1                | 0              | 5.156401                | -4.107141 | 1.271370  |
| 14               | 8                | 0              | 5.215054                | -2.109838 | 1.630106  |
| 15               | 1                | 0              | 4.613549                | -1.423168 | 1.951498  |
| 16               | 8                | 0              | 3.796614                | -4.299894 | -1.527511 |
| 17               | 1                | 0              | 4.259371                | -4.199774 | -2.368802 |
| 18               | 7                | 0              | 0.935918                | -0.694197 | -0.133979 |
| 19               | 6                | 0              | 1.339318                | 0.653122  | -0.090017 |
| 20               | 6                | 0              | -0.447978               | -0.672170 | -0.105518 |
| 21               | 7                | 0              | 0.306288                | 1.474121  | -0.051721 |
| 22               | 6                | 0              | -0.809323               | 0.673855  | -0.062204 |
| 23               | 7                | 0              | -1.245206               | -1.756394 | -0.136340 |
| 24               | 6                | 0              | -2.202548               | 1.002460  | -0.034911 |
| 25               | 6                | 0              | -2.536046               | -1.447792 | -0.109659 |
| 26               | 8                | 0              | -2.728032               | 2.125515  | 0.004135  |
| 27               | 7                | 0              | -3.001347               | -0.155340 | -0.059235 |
| 28               | 7                | 0              | -3.462331               | -2.426805 | -0.141695 |
| 29               | 1                | 0              | -4.023431               | 0.006234  | -0.031386 |
| 30               | 1                | 0              | -4.466694               | -2.244332 | -0.075770 |
| 31               | 1                | 0              | -3.118099               | -3.372317 | -0.134592 |
| 32               | 6                | 0              | 2.687819                | 1.191515  | -0.080189 |
| 33               | 6                | 0              | 3.961464                | 0.669850  | 0.058672  |
| 34               | 6                | 0              | 4.877354                | 1.769366  | 0.016137  |
| 35               | 1                | 0              | 4.218783                | -0.364199 | 0.208322  |
| 36               | 6                | 0              | 4.100731                | 2.952960  | -0.148831 |
| 37               | 7                | 0              | 2.784482                | 2.568985  | -0.208459 |
| 38               | 1                | 0              | 1.961202                | 3.149664  | -0.274587 |
| 39               | 6                | 0              | 4.685720                | 4.222308  | -0.225244 |

|    |   |   |           |           |           |
|----|---|---|-----------|-----------|-----------|
| 40 | 6 | 0 | 6.070241  | 4.295780  | -0.131900 |
| 41 | 6 | 0 | 6.858458  | 3.136617  | 0.033855  |
| 42 | 6 | 0 | 6.277008  | 1.878681  | 0.108584  |
| 43 | 1 | 0 | 4.080736  | 5.115363  | -0.351047 |
| 44 | 1 | 0 | 6.555853  | 5.265734  | -0.186479 |
| 45 | 1 | 0 | 7.937647  | 3.235636  | 0.104529  |
| 46 | 1 | 0 | 6.887782  | 0.989931  | 0.239744  |
| 47 | 7 | 0 | -8.083872 | -0.456121 | 0.134909  |
| 48 | 6 | 0 | -8.599390 | 0.802261  | 0.186898  |
| 49 | 1 | 0 | -9.679537 | 0.883264  | 0.237478  |
| 50 | 6 | 0 | -7.775161 | 1.878921  | 0.174641  |
| 51 | 1 | 0 | -8.165262 | 2.887468  | 0.215652  |
| 52 | 6 | 0 | -6.356570 | 1.618144  | 0.105302  |
| 53 | 7 | 0 | -5.480541 | 2.626992  | 0.090663  |
| 54 | 1 | 0 | -4.461174 | 2.441186  | 0.052939  |
| 55 | 1 | 0 | -5.807076 | 3.578320  | 0.136258  |
| 56 | 7 | 0 | -5.871502 | 0.370839  | 0.052664  |
| 57 | 6 | 0 | -6.698338 | -0.707750 | 0.066685  |
| 58 | 8 | 0 | -6.319923 | -1.882560 | 0.024254  |
| 59 | 1 | 0 | -8.676298 | -1.274575 | 0.144091  |

2:G Counterpoise Corrected Energy: -1869.413726348051  
BSSE Energy: 0.001251061735

| Center<br>Number | Atomic<br>Number | Atomic<br>Type | Coordinates (Angstroms) |           |           |
|------------------|------------------|----------------|-------------------------|-----------|-----------|
|                  |                  |                | X                       | Y         | Z         |
| 1                | 6                | 0              | 3.114668                | 0.924798  | 0.245950  |
| 2                | 8                | 0              | 4.089370                | 0.780296  | -0.778426 |
| 3                | 1                | 0              | 2.673397                | 1.922378  | 0.226133  |
| 4                | 6                | 0              | 3.865865                | 0.706612  | 1.567368  |
| 5                | 6                | 0              | 5.413668                | 1.027645  | -0.249342 |
| 6                | 6                | 0              | 5.227597                | 1.337893  | 1.249520  |
| 7                | 1                | 0              | 3.987865                | -0.357187 | 1.776638  |
| 8                | 1                | 0              | 3.360520                | 1.182393  | 2.412639  |
| 9                | 6                | 0              | 6.298392                | -0.181670 | -0.549992 |
| 10               | 1                | 0              | 5.826593                | 1.915973  | -0.742688 |
| 11               | 1                | 0              | 6.033622                | 0.901017  | 1.852079  |
| 12               | 1                | 0              | 6.257720                | -0.371315 | -1.634200 |
| 13               | 1                | 0              | 7.336182                | 0.065742  | -0.297074 |
| 14               | 8                | 0              | 5.941554                | -1.328227 | 0.200490  |
| 15               | 1                | 0              | 4.982381                | -1.484516 | 0.057530  |
| 16               | 8                | 0              | 5.199884                | 2.759140  | 1.368669  |
| 17               | 1                | 0              | 5.056268                | 2.979378  | 2.298759  |
| 18               | 7                | 0              | 2.021147                | -0.010111 | -0.018587 |
| 19               | 6                | 0              | 0.662060                | 0.281786  | -0.210480 |
| 20               | 6                | 0              | 2.122297                | -1.378756 | -0.037022 |
| 21               | 7                | 0              | -0.069141               | -0.818990 | -0.299946 |
| 22               | 6                | 0              | 0.828081                | -1.860710 | -0.200057 |
| 23               | 7                | 0              | 3.264868                | -2.100678 | 0.060966  |
| 24               | 6                | 0              | 0.626494                | -3.274033 | -0.296245 |
| 25               | 6                | 0              | 3.095919                | -3.403560 | -0.003437 |
| 26               | 8                | 0              | -0.403583               | -3.925787 | -0.465276 |
| 27               | 7                | 0              | 1.861163                | -3.975038 | -0.167433 |
| 28               | 7                | 0              | 4.179313                | -4.222390 | 0.139151  |
| 29               | 1                | 0              | 1.760354                | -4.982906 | -0.183287 |

|    |   |   |           |           |           |
|----|---|---|-----------|-----------|-----------|
| 30 | 1 | 0 | 4.159478  | -5.140894 | -0.277546 |
| 31 | 1 | 0 | 5.072383  | -3.743946 | 0.109037  |
| 32 | 6 | 0 | 0.139199  | 1.632069  | -0.329013 |
| 33 | 6 | 0 | 0.678302  | 2.755017  | -0.943912 |
| 34 | 6 | 0 | -0.300130 | 3.790014  | -0.848529 |
| 35 | 1 | 0 | 1.627196  | 2.805155  | -1.458872 |
| 36 | 6 | 0 | -1.416288 | 3.230939  | -0.160638 |
| 37 | 7 | 0 | -1.125369 | 1.924933  | 0.135446  |
| 38 | 1 | 0 | -1.759908 | 1.289303  | 0.640089  |
| 39 | 6 | 0 | -2.573454 | 3.972199  | 0.119650  |
| 40 | 6 | 0 | -2.599948 | 5.290218  | -0.309192 |
| 41 | 6 | 0 | -1.506627 | 5.865526  | -0.999859 |
| 42 | 6 | 0 | -0.362998 | 5.132992  | -1.272829 |
| 43 | 1 | 0 | -3.406043 | 3.518065  | 0.647279  |
| 44 | 1 | 0 | -3.480024 | 5.895914  | -0.113548 |
| 45 | 1 | 0 | -1.570018 | 6.901695  | -1.319325 |
| 46 | 1 | 0 | 0.471704  | 5.583360  | -1.802770 |
| 47 | 7 | 0 | -7.117684 | -1.546396 | 0.220202  |
| 48 | 6 | 0 | -7.353680 | -0.478582 | 1.072730  |
| 49 | 1 | 0 | -8.355311 | -0.219048 | 1.387375  |
| 50 | 7 | 0 | -6.260224 | 0.142107  | 1.427883  |
| 51 | 6 | 0 | -5.248312 | -0.547514 | 0.781758  |
| 52 | 6 | 0 | -3.834709 | -0.327603 | 0.760181  |
| 53 | 8 | 0 | -3.183627 | 0.551990  | 1.337988  |
| 54 | 7 | 0 | -3.178526 | -1.276792 | -0.056431 |
| 55 | 1 | 0 | -2.164916 | -1.146303 | -0.160018 |
| 56 | 6 | 0 | -3.794588 | -2.298992 | -0.743630 |
| 57 | 7 | 0 | -2.992769 | -3.103999 | -1.491540 |
| 58 | 1 | 0 | -2.037016 | -3.273058 | -1.175645 |
| 59 | 1 | 0 | -3.476681 | -3.911608 | -1.856077 |
| 60 | 7 | 0 | -5.101223 | -2.501670 | -0.735411 |
| 61 | 6 | 0 | -5.761905 | -1.601920 | 0.022841  |
| 62 | 1 | 0 | -7.794833 | -2.171940 | -0.189098 |

**Absolute Energies and Cartesian Coordinates of B3LYP/6-311+G(2df,p)/B3LYP/6-31G(d) Minima and Transition State Conformations of 1**

TS (1 imaginary frequency)  $\chi = 55.0^\circ$   $\theta = 2.0^\circ$

Energy = -1172.9356798

| Center Number | Atomic Number | Atomic Type | Coordinates (Angstroms) |           |           |
|---------------|---------------|-------------|-------------------------|-----------|-----------|
|               |               |             | X                       | Y         | Z         |
| 1             | 6             | 0           | 0.221276                | -1.340952 | 0.009968  |
| 2             | 8             | 0           | -0.630663               | -1.649780 | -1.080505 |
| 3             | 1             | 0           | 1.180031                | -1.840283 | -0.136060 |
| 4             | 6             | 0           | -0.472612               | -1.922060 | 1.251186  |
| 5             | 6             | 0           | -1.443371               | -2.805329 | -0.768555 |
| 6             | 6             | 0           | -1.092322               | -3.203142 | 0.680257  |
| 7             | 1             | 0           | -1.253517               | -1.243330 | 1.600146  |
| 8             | 1             | 0           | 0.227885                | -2.112915 | 2.070516  |
| 9             | 6             | 0           | -2.910660               | -2.440392 | -0.992911 |
| 10            | 1             | 0           | -1.156775               | -3.624645 | -1.439747 |
| 11            | 1             | 0           | -1.982987               | -3.518872 | 1.236331  |
| 12            | 1             | 0           | -3.013747               | -2.060575 | -2.022186 |

|    |   |   |           |           |           |
|----|---|---|-----------|-----------|-----------|
| 13 | 1 | 0 | -3.522549 | -3.346910 | -0.910514 |
| 14 | 8 | 0 | -3.394201 | -1.515482 | -0.037625 |
| 15 | 1 | 0 | -2.771484 | -0.748068 | -0.039721 |
| 16 | 8 | 0 | -0.133885 | -4.262361 | 0.596005  |
| 17 | 1 | 0 | 0.050493  | -4.564220 | 1.499413  |
| 18 | 7 | 0 | 0.471702  | 0.092240  | 0.035421  |
| 19 | 6 | 0 | 1.685716  | 0.813406  | -0.033258 |
| 20 | 6 | 0 | -0.527081 | 1.047149  | 0.069492  |
| 21 | 7 | 0 | 1.473633  | 2.115987  | -0.030581 |
| 22 | 6 | 0 | 0.114611  | 2.276748  | 0.027226  |
| 23 | 7 | 0 | -1.864379 | 0.807433  | 0.117297  |
| 24 | 6 | 0 | -0.673339 | 3.484413  | 0.046088  |
| 25 | 6 | 0 | -2.608532 | 1.892393  | 0.132104  |
| 26 | 8 | 0 | -0.344577 | 4.656419  | 0.030110  |
| 27 | 7 | 0 | -2.075785 | 3.150238  | 0.098724  |
| 28 | 7 | 0 | -3.972563 | 1.765657  | 0.235053  |
| 29 | 1 | 0 | -2.679941 | 3.961579  | 0.169149  |
| 30 | 1 | 0 | -4.544128 | 2.481793  | -0.193329 |
| 31 | 1 | 0 | -4.306959 | 0.818760  | 0.083376  |
| 32 | 6 | 0 | 3.049351  | 0.303778  | -0.073310 |
| 33 | 6 | 0 | 4.187241  | 1.104787  | -0.093876 |
| 34 | 6 | 0 | 5.320767  | 0.260888  | -0.129728 |
| 35 | 1 | 0 | 4.163552  | 2.184176  | -0.081123 |
| 36 | 6 | 0 | 4.863770  | -1.041472 | -0.130356 |
| 37 | 1 | 0 | 6.356907  | 0.569492  | -0.150703 |
| 38 | 1 | 0 | 5.392480  | -1.983465 | -0.154834 |
| 39 | 7 | 0 | 3.492667  | -1.009704 | -0.090856 |
| 40 | 1 | 0 | 2.921538  | -1.837133 | -0.115976 |

TS (1 imaginary frequency)  $\chi = 57.0^\circ$   $\theta = 84.5^\circ$

Energy= -1172.9392628

| Center Number | Atomic Number | Atomic Type | Coordinates (Angstroms) |           |           |
|---------------|---------------|-------------|-------------------------|-----------|-----------|
|               |               |             | X                       | Y         | Z         |
| 1             | 6             | 0           | 0.718675                | 1.086106  | -0.087174 |
| 2             | 8             | 0           | 0.115149                | 1.703440  | 1.042899  |
| 3             | 1             | 0           | 1.809761                | 1.123240  | -0.007874 |
| 4             | 6             | 0           | 0.236588                | 1.890851  | -1.302943 |
| 5             | 6             | 0           | -0.257683               | 3.066798  | 0.738383  |
| 6             | 6             | 0           | 0.151155                | 3.309859  | -0.727703 |
| 7             | 1             | 0           | -0.753669               | 1.553407  | -1.617272 |
| 8             | 1             | 0           | 0.925244                | 1.812270  | -2.150269 |
| 9             | 6             | 0           | -1.748408               | 3.248213  | 1.026710  |
| 10            | 1             | 0           | 0.324972                | 3.737307  | 1.382480  |
| 11            | 1             | 0           | -0.589210               | 3.924726  | -1.254738 |
| 12            | 1             | 0           | -1.935567               | 2.926367  | 2.064134  |
| 13            | 1             | 0           | -1.997024               | 4.314469  | 0.960827  |
| 14            | 8             | 0           | -2.580421               | 2.567582  | 0.106084  |
| 15            | 1             | 0           | -2.300509               | 1.621758  | 0.100226  |
| 16            | 8             | 0           | 1.425880                | 3.954015  | -0.693823 |
| 17            | 1             | 0           | 1.712103                | 4.092458  | -1.610398 |
| 18            | 7             | 0           | 0.367019                | -0.327124 | -0.092115 |
| 19            | 6             | 0           | 1.254793                | -1.417453 | -0.035394 |
| 20            | 6             | 0           | -0.892826               | -0.869246 | -0.095287 |
| 21            | 7             | 0           | 0.623882                | -2.569917 | -0.021291 |



|    |   |   |           |           |           |
|----|---|---|-----------|-----------|-----------|
| 22 | 6 | 0 | -0.714514 | -2.249703 | -0.056491 |
| 23 | 7 | 0 | -2.064409 | -0.178601 | -0.110056 |
| 24 | 6 | 0 | -1.873023 | -3.108022 | -0.046761 |
| 25 | 6 | 0 | -3.136876 | -0.939592 | -0.099057 |
| 26 | 8 | 0 | -1.975000 | -4.320144 | -0.026533 |
| 27 | 7 | 0 | -3.073445 | -2.305130 | -0.070748 |
| 28 | 7 | 0 | -4.372427 | -0.347219 | -0.165720 |
| 29 | 1 | 0 | -3.923527 | -2.855741 | -0.120591 |
| 30 | 1 | 0 | -5.152022 | -0.822835 | 0.268395  |
| 31 | 1 | 0 | -4.353390 | 0.656522  | -0.015639 |
| 32 | 6 | 0 | 2.710600  | -1.234049 | -0.004695 |
| 33 | 6 | 0 | 3.652838  | -1.251602 | -1.017838 |
| 34 | 6 | 0 | 4.926255  | -1.025004 | -0.429344 |
| 35 | 1 | 0 | 3.437524  | -1.419822 | -2.064216 |
| 36 | 6 | 0 | 4.731576  | -0.873994 | 0.928307  |
| 37 | 1 | 0 | 5.877760  | -0.980453 | -0.941358 |
| 38 | 1 | 0 | 5.432783  | -0.693356 | 1.730227  |
| 39 | 7 | 0 | 3.389238  | -0.993425 | 1.176379  |
| 40 | 1 | 0 | 2.955993  | -0.978517 | 2.087640  |

TS (1 imaginary frequency)  $\chi = 51.9^\circ$   $\theta = 281.5^\circ$   
 Energy= -1172.9379326

| Center<br>Number | Atomic<br>Number | Atomic<br>Type | Coordinates (Angstroms) |           |           |
|------------------|------------------|----------------|-------------------------|-----------|-----------|
|                  |                  |                | X                       | Y         | Z         |
| 1                | 6                | 0              | 0.698466                | 1.103689  | 0.021546  |
| 2                | 8                | 0              | -0.021362               | 1.678370  | 1.102413  |
| 3                | 1                | 0              | 1.776064                | 1.161546  | 0.207155  |
| 4                | 6                | 0              | 0.303779                | 1.925433  | -1.215357 |
| 5                | 6                | 0              | -0.393395               | 3.041431  | 0.800716  |
| 6                | 6                | 0              | 0.123323                | 3.329049  | -0.623107 |
| 7                | 1                | 0              | -0.644128               | 1.565004  | -1.622719 |
| 8                | 1                | 0              | 1.066320                | 1.890113  | -2.000477 |
| 9                | 6                | 0              | -1.905721               | 3.187431  | 0.972381  |
| 10               | 1                | 0              | 0.123433                | 3.706421  | 1.503946  |
| 11               | 1                | 0              | -0.595058               | 3.928011  | -1.196535 |
| 12               | 1                | 0              | -2.168616               | 2.837387  | 1.983680  |
| 13               | 1                | 0              | -2.171962               | 4.249582  | 0.909276  |
| 14               | 8                | 0              | -2.644076               | 2.510148  | -0.027980 |
| 15               | 1                | 0              | -2.340735               | 1.570886  | -0.027026 |
| 16               | 8                | 0              | 1.366989                | 4.016368  | -0.477696 |
| 17               | 1                | 0              | 1.701504                | 4.214530  | -1.366409 |
| 18               | 7                | 0              | 0.382041                | -0.317829 | -0.049579 |
| 19               | 6                | 0              | 1.285489                | -1.390848 | 0.071252  |
| 20               | 6                | 0              | -0.867388               | -0.884243 | -0.087284 |
| 21               | 7                | 0              | 0.674907                | -2.554111 | 0.089220  |
| 22               | 6                | 0              | -0.666747               | -2.259298 | -0.000734 |
| 23               | 7                | 0              | -2.049561               | -0.217727 | -0.173253 |
| 24               | 6                | 0              | -1.808999               | -3.139079 | -0.015501 |
| 25               | 6                | 0              | -3.108210               | -0.997794 | -0.178528 |
| 26               | 8                | 0              | -1.889465               | -4.352148 | 0.031319  |
| 27               | 7                | 0              | -3.021775               | -2.360435 | -0.108097 |
| 28               | 7                | 0              | -4.350565               | -0.429900 | -0.307948 |
| 29               | 1                | 0              | -3.859587               | -2.928188 | -0.171400 |
| 30               | 1                | 0              | -5.136703               | -0.908632 | 0.110865  |

|    |   |   |           |           |           |
|----|---|---|-----------|-----------|-----------|
| 31 | 1 | 0 | -4.353535 | 0.577260  | -0.179126 |
| 32 | 6 | 0 | 2.735490  | -1.183834 | 0.145911  |
| 33 | 6 | 0 | 3.600571  | -1.196311 | 1.224578  |
| 34 | 6 | 0 | 4.911180  | -0.949802 | 0.732825  |
| 35 | 1 | 0 | 3.308001  | -1.360165 | 2.252436  |
| 36 | 6 | 0 | 4.816607  | -0.795292 | -0.634468 |
| 37 | 1 | 0 | 5.820120  | -0.889626 | 1.315617  |
| 38 | 1 | 0 | 5.574183  | -0.607110 | -1.381659 |
| 39 | 7 | 0 | 3.495625  | -0.920857 | -0.981961 |
| 40 | 1 | 0 | 3.142642  | -0.966105 | -1.926120 |

TS (1 imaginary frequency)  $\chi = 57.7^\circ$   $\theta = 187.5^\circ$   
 Energy= -1172.9474414

| Center<br>Number | Atomic<br>Number | Atomic<br>Type | Coordinates (Angstroms) |           |           |
|------------------|------------------|----------------|-------------------------|-----------|-----------|
|                  |                  |                | X                       | Y         | Z         |
| 1                | 6                | 0              | 0.072975                | -1.400630 | 0.036211  |
| 2                | 8                | 0              | -0.781580               | -1.658619 | -1.068428 |
| 3                | 1                | 0              | 0.994366                | -1.974408 | -0.058586 |
| 4                | 6                | 0              | -0.707435               | -1.864723 | 1.275634  |
| 5                | 6                | 0              | -1.727550               | -2.701296 | -0.739119 |
| 6                | 6                | 0              | -1.452596               | -3.088262 | 0.728327  |
| 7                | 1                | 0              | -1.419737               | -1.098509 | 1.588430  |
| 8                | 1                | 0              | -0.047950               | -2.104947 | 2.115742  |
| 9                | 6                | 0              | -3.139815               | -2.182577 | -1.010204 |
| 10               | 1                | 0              | -1.524912               | -3.570580 | -1.377353 |
| 11               | 1                | 0              | -2.384183               | -3.284308 | 1.273524  |
| 12               | 1                | 0              | -3.178007               | -1.827856 | -2.052863 |
| 13               | 1                | 0              | -3.850733               | -3.012363 | -0.915381 |
| 14               | 8                | 0              | -3.541875               | -1.178176 | -0.097229 |
| 15               | 1                | 0              | -2.843481               | -0.481308 | -0.107067 |
| 16               | 8                | 0              | -0.620413               | -4.250047 | 0.695493  |
| 17               | 1                | 0              | -0.437765               | -4.508302 | 1.612650  |
| 18               | 7                | 0              | 0.449999                | 0.006688  | 0.023074  |
| 19               | 6                | 0              | 1.729902                | 0.573065  | -0.037582 |
| 20               | 6                | 0              | -0.427908               | 1.070900  | 0.057121  |
| 21               | 7                | 0              | 1.687092                | 1.894134  | -0.019062 |
| 22               | 6                | 0              | 0.354235                | 2.218840  | 0.035533  |
| 23               | 7                | 0              | -1.783581               | 0.989120  | 0.084460  |
| 24               | 6                | 0              | -0.286487               | 3.508944  | 0.061467  |
| 25               | 6                | 0              | -2.395371               | 2.153368  | 0.104459  |
| 26               | 8                | 0              | 0.179687                | 4.634353  | 0.065495  |
| 27               | 7                | 0              | -1.718390               | 3.341115  | 0.094235  |
| 28               | 7                | 0              | -3.765545               | 2.185439  | 0.188641  |
| 29               | 1                | 0              | -2.224780               | 4.216506  | 0.168535  |
| 30               | 1                | 0              | -4.245894               | 2.966440  | -0.238294 |
| 31               | 1                | 0              | -4.204512               | 1.284406  | 0.025346  |
| 32               | 6                | 0              | 3.006594                | -0.118868 | -0.089556 |
| 33               | 6                | 0              | 3.466890                | -1.424382 | -0.253730 |
| 34               | 6                | 0              | 4.883863                | -1.384263 | -0.241892 |
| 35               | 1                | 0              | 2.873091                | -2.315014 | -0.394631 |
| 36               | 6                | 0              | 5.259689                | -0.064276 | -0.074116 |
| 37               | 1                | 0              | 5.551254                | -2.228423 | -0.347032 |
| 38               | 1                | 0              | 6.237163                | 0.391773  | -0.012225 |

|    |   |   |          |          |          |
|----|---|---|----------|----------|----------|
| 39 | 7 | 0 | 4.124011 | 0.684076 | 0.018293 |
| 40 | 1 | 0 | 4.042520 | 1.687761 | 0.113738 |

---

TS (1 imaginary frequency)  $\chi = 161.1^\circ$   $\theta = 172.1^\circ$   
Energy= -1172.9300033

---

| Center<br>Number | Atomic<br>Number | Atomic<br>Type | Coordinates (Angstroms) |           |           |
|------------------|------------------|----------------|-------------------------|-----------|-----------|
|                  |                  |                | X                       | Y         | Z         |
| 1                | 6                | 0              | -0.666448               | -1.096460 | -0.735756 |
| 2                | 8                | 0              | -1.998473               | -0.754127 | -0.414131 |
| 3                | 1                | 0              | -0.576107               | -1.271898 | -1.816095 |
| 4                | 6                | 0              | -0.388591               | -2.380792 | 0.064290  |
| 5                | 6                | 0              | -2.743703               | -1.909781 | 0.033019  |
| 6                | 6                | 0              | -1.748451               | -3.079836 | 0.029775  |
| 7                | 1                | 0              | -0.137777               | -2.115316 | 1.095132  |
| 8                | 1                | 0              | 0.422876                | -2.975997 | -0.354782 |
| 9                | 6                | 0              | -3.349823               | -1.560251 | 1.390898  |
| 10               | 1                | 0              | -3.539686               | -2.119832 | -0.691584 |
| 11               | 1                | 0              | -1.893959               | -3.737069 | 0.897487  |
| 12               | 1                | 0              | -4.079357               | -0.748065 | 1.255322  |
| 13               | 1                | 0              | -3.883370               | -2.428320 | 1.792721  |
| 14               | 8                | 0              | -2.359438               | -1.206591 | 2.342465  |
| 15               | 1                | 0              | -1.953283               | -0.388807 | 2.009377  |
| 16               | 8                | 0              | -1.962862               | -3.791599 | -1.190467 |
| 17               | 1                | 0              | -1.300203               | -4.498341 | -1.240777 |
| 18               | 7                | 0              | 0.215458                | 0.028808  | -0.376046 |
| 19               | 6                | 0              | -0.047220               | 1.399094  | -0.177276 |
| 20               | 6                | 0              | 1.581861                | -0.118807 | -0.205532 |
| 21               | 7                | 0              | 1.053542                | 2.056037  | 0.157514  |
| 22               | 6                | 0              | 2.064841                | 1.136665  | 0.144387  |
| 23               | 7                | 0              | 2.288136                | -1.271827 | -0.364917 |
| 24               | 6                | 0              | 3.473184                | 1.314403  | 0.387184  |
| 25               | 6                | 0              | 3.575164                | -1.124321 | -0.161975 |
| 26               | 8                | 0              | 4.112871                | 2.305095  | 0.697151  |
| 27               | 7                | 0              | 4.154228                | 0.064173  | 0.196833  |
| 28               | 7                | 0              | 4.425832                | -2.193344 | -0.367599 |
| 29               | 1                | 0              | 5.162879                | 0.136688  | 0.271125  |
| 30               | 1                | 0              | 5.231433                | -2.259257 | 0.242561  |
| 31               | 1                | 0              | 3.927771                | -3.069278 | -0.464924 |
| 32               | 6                | 0              | -1.285552               | 2.155271  | -0.317712 |
| 33               | 6                | 0              | -2.545259               | 1.993865  | -0.891334 |
| 34               | 6                | 0              | -3.228661               | 3.229930  | -0.781946 |
| 35               | 1                | 0              | -2.919979               | 1.089248  | -1.338780 |
| 36               | 6                | 0              | -2.378801               | 4.121366  | -0.151575 |
| 37               | 1                | 0              | -4.233256               | 3.441575  | -1.122298 |
| 38               | 1                | 0              | -2.514855               | 5.157207  | 0.124747  |
| 39               | 7                | 0              | -1.217709               | 3.464594  | 0.124919  |
| 40               | 1                | 0              | -0.361567               | 3.844098  | 0.507006  |

---

TS (1 imaginary frequency)  $\chi = 163.0^\circ$   $\theta = 345.2^\circ$   
 Energy= -1172.926514

| Center Number | Atomic Number | Atomic Type | Coordinates (Angstroms) |           |           |
|---------------|---------------|-------------|-------------------------|-----------|-----------|
|               |               |             | X                       | Y         | Z         |
| 1             | 6             | 0           | -0.629127               | -1.059706 | -0.748096 |
| 2             | 8             | 0           | -1.989353               | -0.783952 | -0.442953 |
| 3             | 1             | 0           | -0.529491               | -1.190884 | -1.832754 |
| 4             | 6             | 0           | -0.311257               | -2.362727 | 0.008028  |
| 5             | 6             | 0           | -2.665393               | -1.933061 | 0.127530  |
| 6             | 6             | 0           | -1.659769               | -3.082580 | 0.020835  |
| 7             | 1             | 0           | -0.012344               | -2.125396 | 1.031696  |
| 8             | 1             | 0           | 0.486299                | -2.934738 | -0.465933 |
| 9             | 6             | 0           | -3.118550               | -1.571843 | 1.541454  |
| 10            | 1             | 0           | -3.537671               | -2.157065 | -0.496959 |
| 11            | 1             | 0           | -1.746429               | -3.776329 | 0.868093  |
| 12            | 1             | 0           | -3.846379               | -0.749193 | 1.480549  |
| 13            | 1             | 0           | -3.626328               | -2.432869 | 1.989769  |
| 14            | 8             | 0           | -2.039278               | -1.241619 | 2.399466  |
| 15            | 1             | 0           | -1.685033               | -0.390628 | 2.092871  |
| 16            | 8             | 0           | -1.935218               | -3.744907 | -1.214039 |
| 17            | 1             | 0           | -1.255461               | -4.424777 | -1.343883 |
| 18            | 7             | 0           | 0.212448                | 0.080642  | -0.339105 |
| 19            | 6             | 0           | -0.064134               | 1.461203  | -0.133674 |
| 20            | 6             | 0           | 1.585386                | -0.046362 | -0.194802 |
| 21            | 7             | 0           | 1.035026                | 2.122907  | 0.181807  |
| 22            | 6             | 0           | 2.054182                | 1.214855  | 0.150423  |
| 23            | 7             | 0           | 2.306083                | -1.187943 | -0.376704 |
| 24            | 6             | 0           | 3.465521                | 1.412424  | 0.367065  |
| 25            | 6             | 0           | 3.594452                | -1.022491 | -0.196509 |
| 26            | 8             | 0           | 4.098832                | 2.409012  | 0.667823  |
| 27            | 7             | 0           | 4.161426                | 0.171835  | 0.158859  |
| 28            | 7             | 0           | 4.457397                | -2.078122 | -0.424078 |
| 29            | 1             | 0           | 5.170011                | 0.259691  | 0.215398  |
| 30            | 1             | 0           | 5.274243                | -2.133603 | 0.172181  |
| 31            | 1             | 0           | 3.970415                | -2.961260 | -0.511811 |
| 32            | 6             | 0           | -1.317293               | 2.198875  | -0.239117 |
| 33            | 6             | 0           | -1.482397               | 3.532703  | 0.132544  |
| 34            | 6             | 0           | -2.790824               | 3.924427  | -0.228897 |
| 35            | 1             | 0           | -0.712664               | 4.135758  | 0.590577  |
| 36            | 6             | 0           | -3.397890               | 2.829455  | -0.818113 |
| 37            | 1             | 0           | -3.240395               | 4.896844  | -0.080405 |
| 38            | 1             | 0           | -4.392482               | 2.700319  | -1.221135 |
| 39            | 7             | 0           | -2.499014               | 1.799652  | -0.830834 |
| 40            | 1             | 0           | -2.687157               | 0.842020  | -1.092267 |

TS (1 imaginary frequency)  $\chi = 228.8^\circ$   $\theta = 266.0^\circ$   
 Energy= -1172.9314645

| Center Number | Atomic Number | Atomic Type | Coordinates (Angstroms) |          |           |
|---------------|---------------|-------------|-------------------------|----------|-----------|
|               |               |             | X                       | Y        | Z         |
| 1             | 6             | 0           | 0.409362                | 1.167656 | -0.053569 |

|    |   |   |           |           |           |
|----|---|---|-----------|-----------|-----------|
| 2  | 8 | 0 | 1.421982  | 0.869768  | -1.006489 |
| 3  | 1 | 0 | -0.204170 | 2.012381  | -0.387409 |
| 4  | 6 | 0 | 1.187269  | 1.557746  | 1.205892  |
| 5  | 6 | 0 | 2.519828  | 1.784139  | -0.789046 |
| 6  | 6 | 0 | 2.289714  | 2.435369  | 0.596664  |
| 7  | 1 | 0 | 1.624042  | 0.666302  | 1.664844  |
| 8  | 1 | 0 | 0.573871  | 2.086413  | 1.942292  |
| 9  | 6 | 0 | 3.843906  | 1.032061  | -0.904471 |
| 10 | 1 | 0 | 2.478511  | 2.573211  | -1.552333 |
| 11 | 1 | 0 | 3.205759  | 2.423860  | 1.197428  |
| 12 | 1 | 0 | 3.830097  | 0.426711  | -1.823223 |
| 13 | 1 | 0 | 4.646549  | 1.772172  | -1.006815 |
| 14 | 8 | 0 | 4.161715  | 0.255313  | 0.235213  |
| 15 | 1 | 0 | 3.638088  | -0.564492 | 0.217388  |
| 16 | 8 | 0 | 1.846322  | 3.773623  | 0.358457  |
| 17 | 1 | 0 | 1.742100  | 4.205379  | 1.220841  |
| 18 | 7 | 0 | -0.507779 | 0.045312  | 0.051639  |
| 19 | 6 | 0 | -0.259287 | -1.333208 | 0.159560  |
| 20 | 6 | 0 | -1.874656 | 0.179123  | -0.001453 |
| 21 | 7 | 0 | -1.371427 | -2.035316 | 0.172833  |
| 22 | 6 | 0 | -2.387310 | -1.113523 | 0.082282  |
| 23 | 7 | 0 | -2.548061 | 1.356310  | -0.096758 |
| 24 | 6 | 0 | -3.814885 | -1.305820 | 0.040489  |
| 25 | 6 | 0 | -3.849025 | 1.196088  | -0.144803 |
| 26 | 8 | 0 | -4.492218 | -2.317210 | 0.077117  |
| 27 | 7 | 0 | -4.465465 | -0.026750 | -0.076122 |
| 28 | 7 | 0 | -4.662048 | 2.294425  | -0.324677 |
| 29 | 1 | 0 | -5.471197 | -0.095194 | -0.185526 |
| 30 | 1 | 0 | -5.570298 | 2.277271  | 0.121808  |
| 31 | 1 | 0 | -4.167123 | 3.169517  | -0.205790 |
| 32 | 6 | 0 | 1.084604  | -1.924419 | 0.193198  |
| 33 | 6 | 0 | 1.946250  | -2.199125 | 1.241041  |
| 34 | 6 | 0 | 3.104021  | -2.824540 | 0.695683  |
| 35 | 1 | 0 | 1.749737  | -1.992161 | 2.284078  |
| 36 | 6 | 0 | 2.914271  | -2.918954 | -0.670654 |
| 37 | 1 | 0 | 3.968404  | -3.176784 | 1.241724  |
| 38 | 1 | 0 | 3.540972  | -3.334094 | -1.446606 |
| 39 | 7 | 0 | 1.689039  | -2.379369 | -0.958719 |
| 40 | 1 | 0 | 1.288055  | -2.280290 | -1.879339 |

TS (1 imaginary frequency)  $\chi = 332.7^\circ$   $\theta = 54.2^\circ$

Energy= -1172.9198292

| Center Number | Atomic Number | Atomic Type | Coordinates (Angstroms) |           |           |
|---------------|---------------|-------------|-------------------------|-----------|-----------|
|               |               |             | X                       | Y         | Z         |
| 1             | 6             | 0           | -0.866072               | 0.715222  | -0.677195 |
| 2             | 8             | 0           | -0.320500               | 1.980770  | -0.344175 |
| 3             | 1             | 0           | -1.069823               | 0.676509  | -1.757808 |
| 4             | 6             | 0           | -2.173860               | 0.659097  | 0.130319  |
| 5             | 6             | 0           | -1.389671               | 2.926441  | -0.140558 |
| 6             | 6             | 0           | -2.683315               | 2.099081  | -0.007223 |
| 7             | 1             | 0           | -1.938409               | 0.443742  | 1.176578  |
| 8             | 1             | 0           | -2.898090               | -0.072321 | -0.230062 |
| 9             | 6             | 0           | -1.018017               | 3.746257  | 1.090737  |
| 10            | 1             | 0           | -1.480572               | 3.576678  | -1.020696 |

|    |   |   |           |           |           |
|----|---|---|-----------|-----------|-----------|
| 11 | 1 | 0 | -3.268293 | 2.403608  | 0.869508  |
| 12 | 1 | 0 | -0.098270 | 4.313370  | 0.880411  |
| 13 | 1 | 0 | -1.814009 | 4.464725  | 1.312696  |
| 14 | 8 | 0 | -0.868567 | 2.925145  | 2.236810  |
| 15 | 1 | 0 | -0.166909 | 2.291620  | 2.010270  |
| 16 | 8 | 0 | -3.428416 | 2.300333  | -1.210301 |
| 17 | 1 | 0 | -4.269188 | 1.825220  | -1.117917 |
| 18 | 7 | 0 | 0.128056  | -0.315107 | -0.341880 |
| 19 | 6 | 0 | -0.108264 | -1.638185 | 0.090507  |
| 20 | 6 | 0 | 1.503048  | -0.152708 | -0.305510 |
| 21 | 7 | 0 | 1.000106  | -2.258368 | 0.427772  |
| 22 | 6 | 0 | 2.004690  | -1.352328 | 0.202098  |
| 23 | 7 | 0 | 2.210784  | 0.928679  | -0.727812 |
| 24 | 6 | 0 | 3.426118  | -1.507743 | 0.391916  |
| 25 | 6 | 0 | 3.503124  | 0.799467  | -0.563159 |
| 26 | 8 | 0 | 4.074025  | -2.438155 | 0.839243  |
| 27 | 7 | 0 | 4.100632  | -0.316797 | -0.035371 |
| 28 | 7 | 0 | 4.335836  | 1.853839  | -0.884169 |
| 29 | 1 | 0 | 5.099370  | -0.327187 | 0.139491  |
| 30 | 1 | 0 | 5.239709  | 1.618792  | -1.276063 |
| 31 | 1 | 0 | 3.850229  | 2.575875  | -1.402540 |
| 32 | 6 | 0 | -1.419318 | -2.280452 | 0.085156  |
| 33 | 6 | 0 | -2.100989 | -2.940845 | 1.091040  |
| 34 | 6 | 0 | -3.322261 | -3.420460 | 0.545775  |
| 35 | 1 | 0 | -1.750275 | -3.046338 | 2.108014  |
| 36 | 6 | 0 | -3.355603 | -3.051714 | -0.783305 |
| 37 | 1 | 0 | -4.091414 | -3.972685 | 1.068334  |
| 38 | 1 | 0 | -4.090124 | -3.235635 | -1.554230 |
| 39 | 7 | 0 | -2.204416 | -2.351824 | -1.053947 |
| 40 | 1 | 0 | -1.900923 | -2.070446 | -1.974343 |

TS (1 imaginary frequency)  $\chi = 326.2^\circ$   $\theta = 203.9^\circ$

Energy= -1172.9251975

| Center Number | Atomic Number | Atomic Type | Coordinates (Angstroms) |           |           |
|---------------|---------------|-------------|-------------------------|-----------|-----------|
|               |               |             | X                       | Y         | Z         |
| 1             | 6             | 0           | 0.839190                | -0.870799 | -0.745239 |
| 2             | 8             | 0           | 0.276511                | -2.034352 | -0.147525 |
| 3             | 1             | 0           | 0.906028                | -1.010857 | -1.832756 |
| 4             | 6             | 0           | 2.233933                | -0.795145 | -0.106737 |
| 5             | 6             | 0           | 1.307561                | -3.022041 | 0.033741  |
| 6             | 6             | 0           | 2.649646                | -2.272429 | -0.085701 |
| 7             | 1             | 0           | 2.141455                | -0.417892 | 0.916117  |
| 8             | 1             | 0           | 2.950539                | -0.175510 | -0.642906 |
| 9             | 6             | 0           | 1.054615                | -3.673494 | 1.389077  |
| 10            | 1             | 0           | 1.254079                | -3.770620 | -0.768189 |
| 11            | 1             | 0           | 3.308768                | -2.488697 | 0.764167  |
| 12            | 1             | 0           | 0.084598                | -4.193344 | 1.363964  |
| 13            | 1             | 0           | 1.831574                | -4.417455 | 1.593611  |
| 14            | 8             | 0           | 1.104573                | -2.722204 | 2.439795  |
| 15            | 1             | 0           | 0.425008                | -2.062267 | 2.221641  |
| 16            | 8             | 0           | 3.248632                | -2.689239 | -1.313673 |
| 17            | 1             | 0           | 4.118426                | -2.264479 | -1.377214 |
| 18            | 7             | 0           | -0.074564               | 0.245485  | -0.465210 |
| 19            | 6             | 0           | 0.193364                | 1.553729  | -0.026300 |

|    |   |   |           |           |           |
|----|---|---|-----------|-----------|-----------|
| 20 | 6 | 0 | -1.454259 | 0.105677  | -0.384071 |
| 21 | 7 | 0 | -0.895896 | 2.178546  | 0.378558  |
| 22 | 6 | 0 | -1.922527 | 1.293016  | 0.173351  |
| 23 | 7 | 0 | -2.185149 | -0.952547 | -0.819936 |
| 24 | 6 | 0 | -3.333302 | 1.456043  | 0.420545  |
| 25 | 6 | 0 | -3.470293 | -0.815573 | -0.610811 |
| 26 | 8 | 0 | -3.952007 | 2.377190  | 0.927059  |
| 27 | 7 | 0 | -4.035457 | 0.288357  | -0.023299 |
| 28 | 7 | 0 | -4.327672 | -1.846737 | -0.943474 |
| 29 | 1 | 0 | -5.027369 | 0.302319  | 0.186512  |
| 30 | 1 | 0 | -5.234379 | -1.583673 | -1.310685 |
| 31 | 1 | 0 | -3.865355 | -2.558709 | -1.496121 |
| 32 | 6 | 0 | 1.460227  | 2.264829  | -0.095507 |
| 33 | 6 | 0 | 2.520291  | 2.293968  | -0.995041 |
| 34 | 6 | 0 | 3.376432  | 3.360349  | -0.616066 |
| 35 | 1 | 0 | 2.636396  | 1.655117  | -1.859537 |
| 36 | 6 | 0 | 2.814690  | 3.966301  | 0.491865  |
| 37 | 1 | 0 | 4.296412  | 3.654386  | -1.102560 |
| 38 | 1 | 0 | 3.145616  | 4.807431  | 1.083544  |
| 39 | 7 | 0 | 1.664989  | 3.293660  | 0.798822  |
| 40 | 1 | 0 | 0.965374  | 3.559161  | 1.478292  |

Minimum (0 imaginary frequencies)  $\chi = 47.3^\circ$   $\theta = 165.6^\circ$

Energy= -1172.9477857

| Center<br>Number | Atomic<br>Number | Atomic<br>Type | Coordinates (Angstroms) |           |           |
|------------------|------------------|----------------|-------------------------|-----------|-----------|
|                  |                  |                | X                       | Y         | Z         |
| 1                | 6                | 0              | -0.189628               | -1.376830 | 0.035977  |
| 2                | 8                | 0              | 0.726681                | -1.579060 | 1.101306  |
| 3                | 1                | 0              | -1.145341               | -1.846720 | 0.278666  |
| 4                | 6                | 0              | 0.461450                | -2.031141 | -1.191325 |
| 5                | 6                | 0              | 1.571663                | -2.720107 | 0.831826  |
| 6                | 6                | 0              | 1.175678                | -3.235790 | -0.567235 |
| 7                | 1                | 0              | 1.190300                | -1.348368 | -1.635140 |
| 8                | 1                | 0              | -0.269889               | -2.314383 | -1.955250 |
| 9                | 6                | 0              | 3.031278                | -2.287127 | 0.966840  |
| 10               | 1                | 0              | 1.348774                | -3.500959 | 1.569877  |
| 11               | 1                | 0              | 2.056720                | -3.539092 | -1.146094 |
| 12               | 1                | 0              | 3.161564                | -1.837314 | 1.964464  |
| 13               | 1                | 0              | 3.674649                | -3.173989 | 0.916362  |
| 14               | 8                | 0              | 3.442604                | -1.408885 | -0.064414 |
| 15               | 1                | 0              | 2.798887                | -0.659958 | -0.076264 |
| 16               | 8                | 0              | 0.288890                | -4.337696 | -0.363041 |
| 17               | 1                | 0              | 0.047777                | -4.688034 | -1.234969 |
| 18               | 7                | 0              | -0.454510               | 0.052870  | -0.092432 |
| 19               | 6                | 0              | -1.688195               | 0.710999  | -0.015870 |
| 20               | 6                | 0              | 0.497716                | 1.051377  | -0.111997 |
| 21               | 7                | 0              | -1.553790               | 2.024565  | 0.016716  |
| 22               | 6                | 0              | -0.199514               | 2.251666  | -0.034460 |
| 23               | 7                | 0              | 1.842466                | 0.875073  | -0.183880 |
| 24               | 6                | 0              | 0.532660                | 3.492520  | -0.030541 |
| 25               | 6                | 0              | 2.536148                | 1.992435  | -0.179479 |
| 26               | 8                | 0              | 0.149889                | 4.647681  | 0.023156  |
| 27               | 7                | 0              | 1.947546                | 3.224345  | -0.108258 |
| 28               | 7                | 0              | 3.902285                | 1.927941  | -0.300860 |

|    |   |   |           |           |           |
|----|---|---|-----------|-----------|-----------|
| 29 | 1 | 0 | 2.513688  | 4.063763  | -0.163731 |
| 30 | 1 | 0 | 4.449777  | 2.659640  | 0.132353  |
| 31 | 1 | 0 | 4.277057  | 0.992546  | -0.173876 |
| 32 | 6 | 0 | -2.995981 | 0.085178  | 0.013087  |
| 33 | 6 | 0 | -3.524037 | -1.161818 | -0.313733 |
| 34 | 6 | 0 | -4.926883 | -1.097150 | -0.115715 |
| 35 | 1 | 0 | -2.978758 | -2.014798 | -0.690808 |
| 36 | 6 | 0 | -5.224866 | 0.181264  | 0.317883  |
| 37 | 1 | 0 | -5.637353 | -1.896407 | -0.275325 |
| 38 | 1 | 0 | -6.168285 | 0.638508  | 0.578758  |
| 39 | 7 | 0 | -4.055347 | 0.880888  | 0.393863  |
| 40 | 1 | 0 | -3.929555 | 1.856623  | 0.627326  |

Minimum (0 imaginary frequencies)  $\chi = 47.8^\circ$   $\theta = 322.9^\circ$   
 Energy= -1172.9385676

| Center<br>Number | Atomic<br>Number | Atomic<br>Type | Coordinates (Angstroms) |           |           |
|------------------|------------------|----------------|-------------------------|-----------|-----------|
|                  |                  |                | X                       | Y         | Z         |
| 1                | 6                | 0              | 0.536004                | 1.211635  | 0.030394  |
| 2                | 8                | 0              | -0.286226               | 1.616875  | 1.114099  |
| 3                | 1                | 0              | 1.583464                | 1.432019  | 0.257357  |
| 4                | 6                | 0              | 0.045629                | 2.027721  | -1.176862 |
| 5                | 6                | 0              | -0.830559               | 2.933682  | 0.875609  |
| 6                | 6                | 0              | -0.347433               | 3.359931  | -0.526294 |
| 7                | 1                | 0              | -0.829716               | 1.549145  | -1.622716 |
| 8                | 1                | 0              | 0.812805                | 2.147721  | -1.950208 |
| 9                | 6                | 0              | -2.349863               | 2.868076  | 1.031225  |
| 10               | 1                | 0              | -0.411058               | 3.624829  | 1.617464  |
| 11               | 1                | 0              | -1.140963               | 3.871822  | -1.083898 |
| 12               | 1                | 0              | -2.572916               | 2.438367  | 2.021079  |
| 13               | 1                | 0              | -2.756651               | 3.886431  | 1.012012  |
| 14               | 8                | 0              | -2.976566               | 2.144346  | -0.011653 |
| 15               | 1                | 0              | -2.536258               | 1.260951  | -0.053191 |
| 16               | 8                | 0              | 0.781023                | 4.215679  | -0.334276 |
| 17               | 1                | 0              | 1.046543                | 4.553745  | -1.203826 |
| 18               | 7                | 0              | 0.442010                | -0.237000 | -0.121577 |
| 19               | 6                | 0              | 1.473641                | -1.191333 | 0.002932  |
| 20               | 6                | 0              | -0.729758               | -0.963331 | -0.143704 |
| 21               | 7                | 0              | 1.009753                | -2.422365 | 0.044052  |
| 22               | 6                | 0              | -0.357326               | -2.297989 | -0.032870 |
| 23               | 7                | 0              | -1.986300               | -0.453478 | -0.236073 |
| 24               | 6                | 0              | -1.379197               | -3.315081 | -0.027236 |
| 25               | 6                | 0              | -2.939449               | -1.360134 | -0.219166 |
| 26               | 8                | 0              | -1.304588               | -4.527662 | 0.046153  |
| 27               | 7                | 0              | -2.680638               | -2.698842 | -0.129599 |
| 28               | 7                | 0              | -4.245585               | -0.954884 | -0.343450 |
| 29               | 1                | 0              | -3.439900               | -3.369450 | -0.175195 |
| 30               | 1                | 0              | -4.957995               | -1.525398 | 0.092367  |
| 31               | 1                | 0              | -4.374386               | 0.044311  | -0.214495 |
| 32               | 6                | 0              | 2.889492                | -0.870842 | 0.074622  |
| 33               | 6                | 0              | 3.882538                | -1.519905 | 0.790159  |
| 34               | 6                | 0              | 5.116309                | -0.885357 | 0.495434  |
| 35               | 1                | 0              | 3.710752                | -2.351309 | 1.458485  |
| 36               | 6                | 0              | 4.856212                | 0.131727  | -0.399612 |
| 37               | 1                | 0              | 6.086423                | -1.138065 | 0.900895  |



|    |   |   |          |          |           |
|----|---|---|----------|----------|-----------|
| 38 | 1 | 0 | 5.512412 | 0.846527 | -0.874795 |
| 39 | 7 | 0 | 3.503772 | 0.148196 | -0.638990 |
| 40 | 1 | 0 | 3.059783 | 0.690263 | -1.364237 |

Minimum (0 imaginary frequencies)  $\chi = 62.4^\circ$   $\theta = 196.5^\circ$

Energy= -1172.9474823

| Center<br>Number | Atomic<br>Number | Atomic<br>Type | Coordinates (Angstroms) |           |           |
|------------------|------------------|----------------|-------------------------|-----------|-----------|
|                  |                  |                | X                       | Y         | Z         |
| 1                | 6                | 0              | 0.131213                | -1.383399 | 0.074520  |
| 2                | 8                | 0              | -0.667144               | -1.737981 | -1.046219 |
| 3                | 1                | 0              | 1.083708                | -1.913913 | 0.051043  |
| 4                | 6                | 0              | -0.673290               | -1.821834 | 1.308500  |
| 5                | 6                | 0              | -1.589053               | -2.794712 | -0.694559 |
| 6                | 6                | 0              | -1.347089               | -3.100825 | 0.797216  |
| 7                | 1                | 0              | -1.428094               | -1.075617 | 1.563411  |
| 8                | 1                | 0              | -0.032803               | -1.994578 | 2.179461  |
| 9                | 6                | 0              | -3.009266               | -2.338777 | -1.031359 |
| 10               | 1                | 0              | -1.338483               | -3.685947 | -1.283559 |
| 11               | 1                | 0              | -2.287306               | -3.311472 | 1.321952  |
| 12               | 1                | 0              | -3.026689               | -2.032089 | -2.089697 |
| 13               | 1                | 0              | -3.693620               | -3.188711 | -0.920608 |
| 14               | 8                | 0              | -3.476133               | -1.311130 | -0.177399 |
| 15               | 1                | 0              | -2.808996               | -0.585406 | -0.199045 |
| 16               | 8                | 0              | -0.466717               | -4.225720 | 0.845323  |
| 17               | 1                | 0              | -0.292678               | -4.425024 | 1.778734  |
| 18               | 7                | 0              | 0.445439                | 0.037420  | 0.001237  |
| 19               | 6                | 0              | 1.704283                | 0.649201  | -0.053230 |
| 20               | 6                | 0              | -0.468234               | 1.069729  | 0.037129  |
| 21               | 7                | 0              | 1.619120                | 1.967046  | -0.015230 |
| 22               | 6                | 0              | 0.274320                | 2.244328  | 0.038742  |
| 23               | 7                | 0              | -1.820480               | 0.939327  | 0.041799  |
| 24               | 6                | 0              | -0.412072               | 3.510605  | 0.074356  |
| 25               | 6                | 0              | -2.472868               | 2.081081  | 0.069240  |
| 26               | 8                | 0              | 0.013052                | 4.651665  | 0.102427  |
| 27               | 7                | 0              | -1.837896               | 3.291732  | 0.084980  |
| 28               | 7                | 0              | -3.844330               | 2.064594  | 0.134527  |
| 29               | 1                | 0              | -2.375783               | 4.147595  | 0.165324  |
| 30               | 1                | 0              | -4.346146               | 2.831788  | -0.292827 |
| 31               | 1                | 0              | -4.249126               | 1.150325  | -0.041675 |
| 32               | 6                | 0              | 2.992889                | -0.015973 | -0.120739 |
| 33               | 6                | 0              | 3.465706                | -1.272757 | -0.491590 |
| 34               | 6                | 0              | 4.880335                | -1.241460 | -0.398049 |
| 35               | 1                | 0              | 2.876151                | -2.107750 | -0.841152 |
| 36               | 6                | 0              | 5.240439                | 0.026786  | 0.018422  |
| 37               | 1                | 0              | 5.557577                | -2.055585 | -0.616365 |
| 38               | 1                | 0              | 6.211202                | 0.460553  | 0.210005  |
| 39               | 7                | 0              | 4.096806                | 0.752416  | 0.185123  |
| 40               | 1                | 0              | 4.012135                | 1.731443  | 0.423292  |

Minimum (0 imaginary frequencies)  $\chi = 74.3^\circ$   $\theta = 37.1^\circ$

Energy= -1172.9412346

| Center Number | Atomic Number | Atomic Type | Coordinates (Angstroms) |           |           |
|---------------|---------------|-------------|-------------------------|-----------|-----------|
|               |               |             | X                       | Y         | Z         |
| 1             | 6             | 0           | -0.705614               | 1.079388  | 0.314476  |
| 2             | 8             | 0           | -0.435412               | 1.762259  | -0.910333 |
| 3             | 1             | 0           | -1.778008               | 1.100977  | 0.521811  |
| 4             | 6             | 0           | 0.038278                | 1.859758  | 1.408266  |
| 5             | 6             | 0           | 0.040350                | 3.104964  | -0.649720 |
| 6             | 6             | 0           | -0.047655               | 3.295641  | 0.874825  |
| 7             | 1             | 0           | 1.080148                | 1.546771  | 1.481397  |
| 8             | 1             | 0           | -0.439751               | 1.741566  | 2.386060  |
| 9             | 6             | 0           | 1.446794                | 3.268657  | -1.230745 |
| 10            | 1             | 0           | -0.641839               | 3.809463  | -1.140641 |
| 11            | 1             | 0           | 0.768952                | 3.925241  | 1.249600  |
| 12            | 1             | 0           | 1.419108                | 2.943783  | -2.283328 |
| 13            | 1             | 0           | 1.710882                | 4.333135  | -1.219567 |
| 14            | 8             | 0           | 2.448672                | 2.591300  | -0.495687 |
| 15            | 1             | 0           | 2.205189                | 1.639278  | -0.439587 |
| 16            | 8             | 0           | -1.320487               | 3.889490  | 1.137856  |
| 17            | 1             | 0           | -1.404899               | 3.995545  | 2.098508  |
| 18            | 7             | 0           | -0.351745               | -0.321604 | 0.158382  |
| 19            | 6             | 0           | -1.233380               | -1.418111 | 0.079976  |
| 20            | 6             | 0           | 0.914255                | -0.861281 | 0.122608  |
| 21            | 7             | 0           | -0.594727               | -2.568940 | 0.066332  |
| 22            | 6             | 0           | 0.741112                | -2.240624 | 0.102009  |
| 23            | 7             | 0           | 2.078448                | -0.160179 | 0.061425  |
| 24            | 6             | 0           | 1.904736                | -3.091176 | 0.068802  |
| 25            | 6             | 0           | 3.155477                | -0.914604 | 0.019192  |
| 26            | 8             | 0           | 2.015327                | -4.302951 | 0.071589  |
| 27            | 7             | 0           | 3.099734                | -2.279656 | 0.035358  |
| 28            | 7             | 0           | 4.391713                | -0.315686 | 0.004409  |
| 29            | 1             | 0           | 3.954920                | -2.823939 | 0.063059  |
| 30            | 1             | 0           | 5.140084                | -0.796468 | -0.477446 |
| 31            | 1             | 0           | 4.356604                | 0.681986  | -0.176061 |
| 32            | 6             | 0           | -2.674235               | -1.276796 | -0.040327 |
| 33            | 6             | 0           | -3.686274               | -2.088903 | 0.445550  |
| 34            | 6             | 0           | -4.919425               | -1.568876 | -0.023533 |
| 35            | 1             | 0           | -3.531603               | -2.954843 | 1.073324  |
| 36            | 6             | 0           | -4.635498               | -0.457077 | -0.792156 |
| 37            | 1             | 0           | -5.906367               | -1.960265 | 0.181857  |
| 38            | 1             | 0           | -5.284253               | 0.219183  | -1.329877 |
| 39            | 7             | 0           | -3.276402               | -0.277524 | -0.791277 |
| 40            | 1             | 0           | -2.776618               | 0.397172  | -1.354269 |

Minimum (0 imaginary frequencies)  $\chi = 217.4^\circ$   $\theta = 157.2^\circ$

Energy= -1172.9367174

| Center Number | Atomic Number | Atomic Type | Coordinates (Angstroms) |           |           |
|---------------|---------------|-------------|-------------------------|-----------|-----------|
|               |               |             | X                       | Y         | Z         |
| 1             | 6             | 0           | -0.452103               | -1.221800 | -0.189316 |
| 2             | 8             | 0           | -1.576843               | -1.112201 | -1.048943 |

|    |   |   |           |           |           |
|----|---|---|-----------|-----------|-----------|
| 3  | 1 | 0 | 0.179399  | -2.063558 | -0.491843 |
| 4  | 6 | 0 | -1.059213 | -1.493885 | 1.190943  |
| 5  | 6 | 0 | -2.593320 | -2.030322 | -0.578292 |
| 6  | 6 | 0 | -2.152213 | -2.503727 | 0.826307  |
| 7  | 1 | 0 | -1.508304 | -0.577613 | 1.586512  |
| 8  | 1 | 0 | -0.330045 | -1.882928 | 1.908564  |
| 9  | 6 | 0 | -3.955550 | -1.340311 | -0.582635 |
| 10 | 1 | 0 | -2.618310 | -2.899537 | -1.248681 |
| 11 | 1 | 0 | -2.989533 | -2.481958 | 1.533067  |
| 12 | 1 | 0 | -4.123950 | -0.881421 | -1.568807 |
| 13 | 1 | 0 | -4.726508 | -2.106927 | -0.442187 |
| 14 | 8 | 0 | -4.123097 | -0.409227 | 0.471346  |
| 15 | 1 | 0 | -3.599562 | 0.385660  | 0.259826  |
| 16 | 8 | 0 | -1.638052 | -3.828896 | 0.677205  |
| 17 | 1 | 0 | -1.388425 | -4.147546 | 1.558784  |
| 18 | 7 | 0 | 0.416839  | -0.054003 | -0.278399 |
| 19 | 6 | 0 | 0.176799  | 1.311958  | -0.061422 |
| 20 | 6 | 0 | 1.790778  | -0.200562 | -0.210073 |
| 21 | 7 | 0 | 1.293463  | 1.988809  | 0.138595  |
| 22 | 6 | 0 | 2.304560  | 1.063627  | 0.056808  |
| 23 | 7 | 0 | 2.460942  | -1.374088 | -0.344267 |
| 24 | 6 | 0 | 3.729445  | 1.232127  | 0.182501  |
| 25 | 6 | 0 | 3.762123  | -1.236348 | -0.249278 |
| 26 | 8 | 0 | 4.403394  | 2.222990  | 0.405573  |
| 27 | 7 | 0 | 4.379490  | -0.036669 | -0.006654 |
| 28 | 7 | 0 | 4.577961  | -2.328874 | -0.451984 |
| 29 | 1 | 0 | 5.391647  | 0.023696  | -0.008504 |
| 30 | 1 | 0 | 5.433746  | -2.375480 | 0.086653  |
| 31 | 1 | 0 | 4.063605  | -3.200572 | -0.474319 |
| 32 | 6 | 0 | -1.103322 | 1.998038  | -0.089293 |
| 33 | 6 | 0 | -2.294693 | 1.841609  | -0.793862 |
| 34 | 6 | 0 | -3.111601 | 2.968679  | -0.504838 |
| 35 | 1 | 0 | -2.486875 | 1.050935  | -1.502469 |
| 36 | 6 | 0 | -2.402277 | 3.783888  | 0.356919  |
| 37 | 1 | 0 | -4.103971 | 3.162118  | -0.888646 |
| 38 | 1 | 0 | -2.663859 | 4.724631  | 0.819155  |
| 39 | 7 | 0 | -1.196628 | 3.187348  | 0.599307  |
| 40 | 1 | 0 | -0.413235 | 3.573666  | 1.108445  |

Minimum (0 imaginary frequencies)  $\chi = 224.4^\circ$   $\theta = 329.6^\circ$   
 Energy= -1172.9337137

| Center<br>Number | Atomic<br>Number | Atomic<br>Type | Coordinates (Angstroms) |           |           |
|------------------|------------------|----------------|-------------------------|-----------|-----------|
|                  |                  |                | X                       | Y         | Z         |
| 1                | 6                | 0              | -0.440984               | -1.129478 | -0.083569 |
| 2                | 8                | 0              | -1.523977               | -1.032257 | -1.020230 |
| 3                | 1                | 0              | 0.180925                | -1.993340 | -0.336052 |
| 4                | 6                | 0              | -1.141610               | -1.367044 | 1.255997  |
| 5                | 6                | 0              | -2.553789               | -1.965562 | -0.599935 |
| 6                | 6                | 0              | -2.202300               | -2.395629 | 0.844375  |
| 7                | 1                | 0              | -1.613486               | -0.442907 | 1.604872  |
| 8                | 1                | 0              | -0.460990               | -1.736925 | 2.028879  |
| 9                | 6                | 0              | -3.929982               | -1.314605 | -0.722017 |
| 10               | 1                | 0              | -2.505348               | -2.848064 | -1.250209 |
| 11               | 1                | 0              | -3.085562               | -2.363361 | 1.491478  |

|    |   |   |           |           |           |
|----|---|---|-----------|-----------|-----------|
| 12 | 1 | 0 | -4.021465 | -0.847453 | -1.715859 |
| 13 | 1 | 0 | -4.686757 | -2.104596 | -0.664896 |
| 14 | 8 | 0 | -4.234514 | -0.407242 | 0.323138  |
| 15 | 1 | 0 | -3.675606 | 0.382336  | 0.224936  |
| 16 | 8 | 0 | -1.669367 | -3.718222 | 0.762994  |
| 17 | 1 | 0 | -1.490628 | -4.020052 | 1.667412  |
| 18 | 7 | 0 | 0.451833  | 0.011172  | -0.162699 |
| 19 | 6 | 0 | 0.255944  | 1.392739  | 0.067102  |
| 20 | 6 | 0 | 1.823992  | -0.171196 | -0.154060 |
| 21 | 7 | 0 | 1.397053  | 2.034306  | 0.207805  |
| 22 | 6 | 0 | 2.377644  | 1.079969  | 0.088194  |
| 23 | 7 | 0 | 2.454657  | -1.362724 | -0.316136 |
| 24 | 6 | 0 | 3.811623  | 1.211596  | 0.147554  |
| 25 | 6 | 0 | 3.762296  | -1.259743 | -0.276046 |
| 26 | 8 | 0 | 4.522981  | 2.182872  | 0.332890  |
| 27 | 7 | 0 | 4.419356  | -0.076446 | -0.064349 |
| 28 | 7 | 0 | 4.539626  | -2.374646 | -0.508137 |
| 29 | 1 | 0 | 5.431754  | -0.041997 | -0.109121 |
| 30 | 1 | 0 | 5.415761  | -2.440598 | -0.005361 |
| 31 | 1 | 0 | 4.002259  | -3.232605 | -0.501019 |
| 32 | 6 | 0 | -1.022564 | 2.081647  | 0.065779  |
| 33 | 6 | 0 | -1.356585 | 3.283847  | 0.673704  |
| 34 | 6 | 0 | -2.667044 | 3.626167  | 0.257514  |
| 35 | 1 | 0 | -0.707195 | 3.839677  | 1.334547  |
| 36 | 6 | 0 | -3.101997 | 2.636958  | -0.604085 |
| 37 | 1 | 0 | -3.233449 | 4.497769  | 0.555812  |
| 38 | 1 | 0 | -4.029485 | 2.524950  | -1.147650 |
| 39 | 7 | 0 | -2.104113 | 1.695412  | -0.703293 |
| 40 | 1 | 0 | -2.078462 | 0.878444  | -1.303488 |

---
